# Supplementary material
Source: HighWire-hosted journal article supplement (https://bjsm.bmj.com/content/56/16/901)
Supplement: inline-supplementary-material-1 [file inline-supplementary-material-1.pdf]

---

## Contents of supplementary appendix

|                 |                                                                                                                                                                                                                                                                                                                                                                                                                                  |           |
|-----------------|----------------------------------------------------------------------------------------------------------------------------------------------------------------------------------------------------------------------------------------------------------------------------------------------------------------------------------------------------------------------------------------------------------------------------------|-----------|
| <b>Table S1</b> | Sensitivity analyses and justification.                                                                                                                                                                                                                                                                                                                                                                                          | <b>3</b>  |
| <b>Table S2</b> | Propensity score-matched baseline covariates and adjusted relative risks (95% confidence intervals) of SARS-CoV-2 infection, severe COVID-19 outcomes, and COVID-19 related death associated with study patients who engaged in physical activities according to exercise guideline (patients with insufficient aerobic and muscle strengthening versus those with aerobic and muscle strengthening; propensity score matched A) | <b>6</b>  |
| <b>Table S3</b> | Baseline covariates and adjusted relative risks (95% confidence intervals) of severe COVID-19 outcomes and COVID-19 related death associated with laboratory COVID-19 confirmed patients engaging in physical activities according to exercise guideline (total n = 2295; cohort B)                                                                                                                                              | <b>14</b> |
| <b>Table S4</b> | Baseline characteristics of patients who performed the SARS-CoV-2 testing stratified by MET score in the Korean nationwide cohort (cohort C)                                                                                                                                                                                                                                                                                     | <b>22</b> |
| <b>Table S5</b> | Adjusted relative risks (95% confidence intervals) of SARS-CoV-2 infection associated with study patients stratified by MET score (cohort C)                                                                                                                                                                                                                                                                                     | <b>28</b> |
| <b>Table S6</b> | Propensity score-matched baseline covariates and adjusted relative risks (95% confidence intervals) of SARS-CoV-2 infection, severe COVID-19 outcomes, and COVID-19 related death associated with study patients who engaged in physical activities according to MET score (patients with insufficient aerobic and muscle strengthening versus those with aerobic and muscle strengthening; propensity score matched C)          | <b>32</b> |
| <b>Table S7</b> | Baseline characteristics of patients who performed the SARS-CoV-2 testing and received the general health examination (2015-2020) stratified by MET score in the Korean nationwide cohort (cohort D)                                                                                                                                                                                                                             | <b>40</b> |
| <b>Table S8</b> | Adjusted relative risks (95% confidence intervals) of SARS-CoV-2 infection associated with study participants who engaged in physical activities according to                                                                                                                                                                                                                                                                    | <b>45</b> |

|                  |                                                                                                                                                                                                                                                                                                                               |           |
|------------------|-------------------------------------------------------------------------------------------------------------------------------------------------------------------------------------------------------------------------------------------------------------------------------------------------------------------------------|-----------|
|                  | MET score (cohort D)                                                                                                                                                                                                                                                                                                          |           |
| <b>Table S9</b>  | Propensity score-matched baseline covariates and adjusted relative risks (95% confidence intervals) of SARS-CoV-2 infection associated with study participants who engaged in physical activities according MET score (insufficient physical activity versus sufficient physical activity; propensity score matched cohort D) | <b>48</b> |
| <b>Table S10</b> | Baseline characteristics of COVID-19 patients who received the general health examination (2015-2020) in the Korean nationwide cohort (total n = 3882; Cohort E)                                                                                                                                                              | <b>56</b> |
| <b>Table S11</b> | Age-stratified outcome characteristics in cohort A (total n = 76,395)                                                                                                                                                                                                                                                         | <b>63</b> |
| <b>Table S12</b> | Bonferroni-Sidak's correction for multiple comparisons in Table 2                                                                                                                                                                                                                                                             | <b>64</b> |
| <b>Table S13</b> | Bonferroni-Sidak's correction for multiple comparisons in Table S5                                                                                                                                                                                                                                                            | <b>67</b> |
| <b>Table S14</b> | Previous studies on the association between physical activity and the risk of COVID-19                                                                                                                                                                                                                                        | <b>71</b> |

**Table S1.** Sensitivity analyses and justification.

| Sensitivity analysis (1 to 8)                                                                                                                                                                                                                     | Cohort                      | Justification                                                                                                                                                                                                                                                            |
|---------------------------------------------------------------------------------------------------------------------------------------------------------------------------------------------------------------------------------------------------|-----------------------------|--------------------------------------------------------------------------------------------------------------------------------------------------------------------------------------------------------------------------------------------------------------------------|
| 1. Primary endpoint analysis                                                                                                                                                                                                                      | Cohort A                    | - Main results<br><br>- The “primary endpoint” was positive SARS-CoV-2 test, severe COVID-19 outcomes, or COVID-19-related death.                                                                                                                                        |
| 2. Subgroup analysis of the risk of positive SARS-CoV-2 test, severe COVID-19 outcomes, or COVID-19-related death in patients who engaged in physical activities stratified by age groups, gender, smoking status, and Charlson comorbidity index | Cohort A                    | - To test the stability of our main results, we performed subgroup analysis, in which there was stratification according to age groups, gender, smoking status, and Charlson comorbidity index.                                                                          |
| 3. Main analysis after propensity score matching                                                                                                                                                                                                  | Matched cohorts A, C, and D | - We performed propensity score matching to reduce potential confounding effects and balance the baseline characteristics (matched cohort A, insufficient aerobic and muscle strengthening versus aerobic and muscle strengthening; matched cohort C and D, insufficient |

---

physical activity [MET, 0 to 500] versus sufficient physical activity [MET,  $\geq$  500]). And then we repeated the main analysis after propensity score matching.

---

|                                                             |                     |                                                                                                                                                                                                                    |
|-------------------------------------------------------------|---------------------|--------------------------------------------------------------------------------------------------------------------------------------------------------------------------------------------------------------------|
| 4. After restricting to only patients with COVID-19         | Cohorts B and E     | - We repeated the main analysis, including only COVID-19 patients.                                                                                                                                                 |
| 5. Redefined cohort using alternative “exposure” definition | Cohorts C, D, and E | - To test the stability and reliability of our results, we conducted two differential conditions of “exposure” such as using the physical activity guidelines (cohort A and B) and MET score (cohort C, D, and E). |
| 6. Extended cohort                                          | Cohorts D and E     | - We extended and linked the national general health examination to 2015 instead of 2018. This extended cohort increased the generalizability and reliability of our main results.                                 |
| 7. Secondary endpoint analysis                              | Cohorts B and E     | - The “secondary endpoint” was the length of hospital stay among COVID-19 confirmed patients.                                                                                                                      |

---

---

|                                                |                                                     |                                                                                                                                                                                                                                                                                                                           |
|------------------------------------------------|-----------------------------------------------------|---------------------------------------------------------------------------------------------------------------------------------------------------------------------------------------------------------------------------------------------------------------------------------------------------------------------------|
| 8. DAG approach                                | Cohorts A to E and<br>matched cohorts A, C and<br>E | - To avoid overfitting issues, we conducted minimal selected matching covariates in the original cohort. DAGs can be used to select covariates for support causal interpretation.<br><br>- Selected confounders by DAGs were selected for age, sex, region of residence, household income, smoking, and alcoholic drinks. |
| 9. Sidak's correction for multiple comparisons | Cohorts A and D                                     | - We used the Sidak's correction for multiple comparisons to reduce the probability of type 1 error.                                                                                                                                                                                                                      |

---

Abbreviations: COVID-19, coronavirus disease; DAGs, directed acyclic graphs; MET, metabolic equivalent of task; SARS-CoV-2, severe acute respiratory syndrome coronavirus 2.

**Table S2.** Propensity score-matched baseline covariates and adjusted relative risks (95% confidence intervals) of SARS-CoV-2 infection, severe COVID-19 outcomes, and COVID-19 related death associated with study patients who engaged in physical activities according to exercise guideline (patients with insufficient aerobic and muscle strengthening versus those with aerobic and muscle strengthening; propensity score matched A)

| Characteristic    | Types of physical activity                    |                                  | SMD   |
|-------------------|-----------------------------------------------|----------------------------------|-------|
|                   | Insufficient aerobic and muscle strengthening | Aerobic and muscle strengthening |       |
| Total, n (%)      | 2649                                          | 2649                             |       |
| Age, years, n (%) |                                               |                                  | 0.003 |
| 20-39             | 622 (23.5)                                    | 656 (24.8)                       |       |
| 40-59             | 1286 (48.6)                                   | 1212 (45.8)                      |       |
| ≥ 60              | 741 (28.0)                                    | 781 (29.5)                       |       |
| Sex, n (%)        |                                               |                                  | 0.006 |

|                                     |             |             |       |
|-------------------------------------|-------------|-------------|-------|
| Male                                | 1959 (74.0) | 1967 (74.3) |       |
| Female                              | 690 (26.1)  | 682 (25.8)  |       |
| Region of residence, n (%)          |             |             | 0.015 |
| Seoul Capital Area                  | 1215 (45.9) | 1207 (45.6) |       |
| Daegu/Gyeongbuk area                | 495 (18.7)  | 476 (18.0)  |       |
| Other area                          | 939 (35.5)  | 966 (36.5)  |       |
| Charlson comorbidity index, n (%)   |             |             | 0.030 |
| 0                                   | 1479 (55.8) | 1463 (55.2) |       |
| 1                                   | 383 (14.5)  | 343 (13.0)  |       |
| ≥2                                  | 787 (29.7)  | 843 (31.8)  |       |
| History of diabetes mellitus, n (%) | 235 (8.9)   | 253 (9.6)   | 0.022 |

|                                            |              |              |       |
|--------------------------------------------|--------------|--------------|-------|
| History of tuberculosis, n (%)             | 57 (2.2)     | 62 (2.3)     | 0.013 |
| History of stroke, n (%)                   | 39 (1.5)     | 33 (1.3)     | 0.017 |
| History of cardiovascular disease, n (%)   | 95 (3.6)     | 94 (3.6)     | 0.002 |
| History of hypertension, n (%)             | 499 (18.8)   | 544 (20.5)   | 0.040 |
| History of dyslipidemia, n (%)             | 196 (7.4)    | 198 (7.5)    | 0.003 |
| Body mass index, kg/m <sup>2</sup> , n (%) |              |              | 0.011 |
| <25                                        | 1615 (61.0)  | 1609 (60.7)  |       |
| 25–30                                      | 857 (32.4)   | 886 (33.5)   |       |
| ≥30                                        | 177 (6.7)    | 154 (5.8)    |       |
| Systolic blood pressure, mmHg, mean (SD)   | 122.4 (14.6) | 123.0 (13.6) | 0.040 |
| Diastolic blood pressure, mmHg, mean (SD)  | 75.7 (10.1)  | 76.1 (9.6)   | 0.034 |



|                                           |              |              |       |
|-------------------------------------------|--------------|--------------|-------|
| Fasting blood glucose, mg/dL, mean (SD)   | 101.2 (24.9) | 101.5 (25.0) | 0.011 |
| Serum total cholesterol, mg/dL, mean (SD) | 192.6 (39.1) | 191.5 (38.7) | 0.028 |
| Glomerular filtration rate, ml/min, n (%) |              |              | 0.036 |
| $\geq 90$                                 | 1313 (49.6)  | 1208 (45.6)  |       |
| 60-89                                     | 1173 (44.3)  | 1326 (50.1)  |       |
| $\leq 59$                                 | 163 (6.2)    | 115 (4.3)    |       |
| Household income, n (%)                   |              |              | 0.012 |
| Low (0–39 percentile)                     | 644 (24.3)   | 667 (25.2)   |       |
| Middle (40–79 percentile)                 | 1102 (41.6)  | 1080 (40.8)  |       |
| High (80–100 percentile)                  | 903 (34.1)   | 902 (34.1)   |       |
| Smoking, n (%)                            |              |              | 0.023 |

|                                        |             |             |       |
|----------------------------------------|-------------|-------------|-------|
| Never smoker                           | 1366 (51.6) | 1296 (48.9) |       |
| Ex-smoker                              | 586 (22.1)  | 774 (29.2)  |       |
| Current smoker                         | 697 (26.3)  | 579 (21.9)  |       |
| Alcoholic drinks, days per week, n (%) |             |             | 0.002 |
| <1                                     | 1540 (58.1) | 1465 (55.3) |       |
| 1–2                                    | 710 (26.8)  | 840 (31.7)  |       |
| 3–4                                    | 293 (11.1)  | 82 (3.1)    |       |
| ≥5                                     | 106 (4.0)   | 82 (3.1)    |       |
| Use of medication, n (%)               |             |             |       |
| Medication for hypertension, n (%)     | 466 (17.6)  | 507 (19.1)  | 0.037 |
| Medication for dyslipidemia, n (%)     | 163 (6.2)   | 162 (6.1)   | 0.001 |

|                                                      |           |                            |       |
|------------------------------------------------------|-----------|----------------------------|-------|
| Medication for diabetes mellitus, n (%)              | 218 (8.2) | 235 (8.9)                  | 0.021 |
| Medication for cardiovascular disease, n (%)         | 84 (3.2)  | 86 (3.3)                   | 0.004 |
| <hr/>                                                |           |                            |       |
| COVID-19, n (%)                                      | 95 (3.6)  | 69 (2.6)                   |       |
| Model 1* (age and sex adjusted)                      | 1.0 (ref) | <b>0.72 (0.53 to 0.99)</b> |       |
| Model 2 <sup>§</sup> (fully adjusted)                | 1.0 (ref) | <b>0.73 (0.54 to 0.99)</b> |       |
| Model 3 <sup>  </sup> (selected confounders by DAGs) | 1.0 (ref) | <b>0.73 (0.54 to 0.99)</b> |       |
| Severe COVID-19 <sup>‡</sup> , n (%)                 | 21 (0.79) | 9 (0.34)                   |       |
| Model 1* (age and sex adjusted)                      | 1.0 (ref) | <b>0.41 (0.18 to 0.94)</b> |       |
| Model 2 <sup>§</sup> (fully adjusted)                | 1.0 (ref) | <b>0.43 (0.20 to 0.95)</b> |       |
| Model 3 <sup>  </sup> (selected confounders by DAGs) | 1.0 (ref) | <b>0.41 (0.18 to 0.95)</b> |       |
| COVID-19 related death, n (%)                        | 3 (0.11)  | 1 (0.04)                   |       |

|                                                      |           |                     |
|------------------------------------------------------|-----------|---------------------|
| Model 1* (age and sex adjusted)                      | 1.0 (ref) | 0.31 (0.02 to 3.17) |
| Model 2 <sup>§</sup> (fully adjusted)                | 1.0 (ref) | 0.34 (0.04 to 3.20) |
| Model 3 <sup>  </sup> (selected confounders by DAGs) | 1.0 (ref) | 0.32 (0.02 to 3.18) |

---

Abbreviations: CI, confidence interval; COVID-19, coronavirus disease; DAGs, directed acyclic graphs; SARS-CoV-2, severe acute respiratory syndrome coronavirus 2; SD, standard deviation; SMD, standardized mean difference.

\* Model 1: adjusted for age (20–39, 40–59, and  $\geq 60$  years) and sex.

<sup>§</sup> Model 2: adjusted for the age; sex; region of residence (Seoul Capital Area, Daegu/Gyeongbuk area, and other areas); Charlson comorbidity index (0, 1, and  $\geq 2$ ); history of diabetes mellitus, tuberculosis, stroke, and cardiovascular disease; body mass index (continuous; using the restricted cubic spline function); systolic blood pressure (continuous); diastolic blood pressure (continuous); fasting blood glucose (continuous); serum total cholesterol (continuous); glomerular filtration rate ( $\geq 90$ , 60–89, and  $\leq 59$  ml/min); household income (low, middle, and high); smoking (never, ex-, and current); alcoholic drinks ( $< 1$ , 1–2, 3–4,  $\geq 5$  days per week); medication for hypertension, diabetes mellitus, and cardiovascular disease.

<sup>||</sup> Model 3: adjusted for potential confounders selected by DAGs (age; sex; region of residence; household income; smoking; and alcoholic drinks).

<sup>‡</sup> Severe COVID-19 consisted of requirement of oxygen therapy, admission to the intensive care unit, invasive ventilation, or death.

An SMD of less than 0.1 indicates no major imbalance. All SMD values were less than 0.04 in the propensity-score-matched cohort.

Numbers in bold indicate significant differences ( $P < 0.05$ ).

**Table S3.** Baseline covariates and adjusted relative risks (95% confidence intervals) of severe COVID-19 outcomes and COVID-19 related death associated with laboratory COVID-19 confirmed patients engaging in physical activities according to exercise guideline (total n = 2295; cohort B)

| Characteristic    | Types of physical activity                    |                           |              |                                  |
|-------------------|-----------------------------------------------|---------------------------|--------------|----------------------------------|
|                   | Insufficient aerobic and muscle strengthening | Muscle strengthening only | Aerobic only | Aerobic and muscle strengthening |
| Total, n (%)      | 1293 (56.3)                                   | 150 (6.5)                 | 561 (24.4)   | 291 (12.7)                       |
| Age, years, n (%) |                                               |                           |              |                                  |
| 20-39             | 203 (15.7)                                    | 44 (29.3)                 | 92 (16.4)    | 74 (25.4)                        |
| 40-59             | 627 (48.5)                                    | 68 (45.3)                 | 261 (46.5)   | 139 (47.8)                       |
| ≥ 60              | 463 (35.8)                                    | 38 (25.3)                 | 208 (37.1)   | 78 (26.8)                        |
| Sex, n (%)        |                                               |                           |              |                                  |

|                                     |             |            |            |            |
|-------------------------------------|-------------|------------|------------|------------|
| Male                                | 420 (32.6)  | 84 (56.0)  | 231 (41.2) | 164 (56.4) |
| Female                              | 873 (67.5)  | 66 (44.0)  | 330 (58.8) | 127 (43.6) |
| Region of residence, n (%)          |             |            |            |            |
| Seoul Capital Area                  | 158 (12.2)  | 18 (12.0)  | 72 (12.8)  | 42 (14.4)  |
| Daegu/Gyeongbuk area                | 1015 (78.9) | 115 (76.7) | 433 (77.2) | 206 (70.8) |
| Other area                          | 120 (9.3)   | 17 (11.3)  | 56 (10.0)  | 43 (14.8)  |
| Charlson comorbidity index, n (%)   |             |            |            |            |
| 0                                   | 769 (59.5)  | 104 (69.3) | 334 (59.5) | 185 (63.6) |
| 1                                   | 193 (14.9)  | 16 (10.7)  | 88 (15.7)  | 35 (12.0)  |
| ≥2                                  | 331 (25.6)  | 30 (20.0)  | 139 (24.8) | 71 (24.4)  |
| History of diabetes mellitus, n (%) | 128 (9.9)   | 10 (6.7)   | 53 (9.5)   | 25 (8.6)   |

|                                            |              |              |              |              |
|--------------------------------------------|--------------|--------------|--------------|--------------|
| History of tuberculosis, n (%)             | 27 (2.1)     | 3 (2.0)      | 10 (1.8)     | 3 (1.0)      |
| History of stroke, n (%)                   | 19 (1.5)     | 0 (0.0)      | 11 (2.0)     | 2 (0.7)      |
| History of cardiovascular disease, n (%)   | 28 (2.2)     | 4 (2.7)      | 10 (1.8)     | 5 (1.7)      |
| History of hypertension, n (%)             | 262 (20.3)   | 19 (12.7)    | 123 (21.9)   | 50 (17.2)    |
| History of dyslipidemia, n (%)             | 86 (6.7)     | 12 (8.0)     | 43 (7.7)     | 11 (3.8)     |
| Body mass index, kg/m <sup>2</sup> , n (%) |              |              |              |              |
| <25                                        | 792 (61.3)   | 98 (65.3)    | 349 (62.2)   | 178 (61.2)   |
| 25–30                                      | 432 (33.4)   | 44 (29.3)    | 188 (33.5)   | 98 (33.7)    |
| ≥30                                        | 69 (5.3)     | 8 (5.3)      | 24 (4.3)     | 15 (5.2)     |
| Systolic blood pressure, mmHg, mean (SD)   | 121.0 (15.5) | 120.4 (14.4) | 121.5 (15.7) | 120.5 (14.5) |
| Diastolic blood pressure, mmHg, mean (SD)  | 74.8 (10.5)  | 74.7 (9.3)   | 74.9 (10.0)  | 75.1 (9.6)   |



|                                           |              |              |              |              |
|-------------------------------------------|--------------|--------------|--------------|--------------|
| Fasting blood glucose, mg/dL, mean (SD)   | 100.6 (25.3) | 95.9 (18.0)  | 101.7 (26.2) | 99.0 (18.7)  |
| Serum total cholesterol, mg/dL, mean (SD) | 196.2 (39.2) | 191.7 (49.2) | 191.9 (40.3) | 190.6 (36.8) |
| Glomerular filtration rate, ml/min, n (%) |              |              |              |              |
| ≥90                                       | 621 (48.4)   | 81 (54.0)    | 272 (48.7)   | 130 (44.8)   |
| 60-89                                     | 590 (46.0)   | 61 (40.7)    | 259 (46.3)   | 155 (53.5)   |
| ≤59                                       | 72 (5.6)     | 8 (5.3)      | 28 (5.0)     | 5 (1.7)      |
| Household income, n (%)                   |              |              |              |              |
| Low (0–39 percentile)                     | 605 (46.8)   | 47 (31.3)    | 219 (39.0)   | 111 (38.1)   |
| Middle (40–79 percentile)                 | 441 (34.1)   | 66 (44.0)    | 208 (37.1)   | 101 (34.7)   |
| High (80–100 percentile)                  | 247 (19.1)   | 37 (24.7)    | 134 (23.9)   | 79 (27.2)    |
| Smoking, n (%)                            |              |              |              |              |

|                                        |             |            |            |            |
|----------------------------------------|-------------|------------|------------|------------|
| Never smoker                           | 1063 (82.2) | 105 (70.0) | 432 (77.0) | 195 (67.0) |
| Ex-smoker                              | 147 (11.4)  | 38 (25.3)  | 86 (15.3)  | 66 (22.7)  |
| Current smoker                         | 83 (6.4)    | 7 (4.7)    | 53 (7.7)   | 30 (10.3)  |
| Alcoholic drinks, days per week, n (%) |             |            |            |            |
| <1                                     | 1041 (80.5) | 98 (65.3)  | 396 (70.7) | 190 (65.5) |
| 1–2                                    | 179 (13.8)  | 40 (27.7)  | 125 (70.7) | 81 (27.9)  |
| 3–4                                    | 53 (4.1)    | 8 (5.3)    | 29 (5.2)   | 13 (4.5)   |
| ≥5                                     | 20 (1.6)    | 4 (2.7)    | 10 (1.8)   | 6 (2.1)    |
| Use of medication, n (%)               |             |            |            |            |
| Medication for hypertension, n (%)     | 243 (18.8)  | 18 (12.0)  | 115 (20.5) | 46 (15.8)  |
| Medication for dyslipidemia, n (%)     | 67 (5.2)    | 10 (6.7)   | 35 (6.2)   | 11 (3.8)   |

|                                                      |             |                     |                     |                            |
|------------------------------------------------------|-------------|---------------------|---------------------|----------------------------|
| Medication for diabetes mellitus, n (%)              | 122 (9.4)   | 10 (6.7)            | 49 (8.7)            | 23 (7.9)                   |
| Medication for cardiovascular disease, n (%)         | 27 (2.1)    | 4 (2.7)             | 8 (1.4)             | 5 (1.7)                    |
| Severe COVID-19*, n (%)                              | 273 (21.1)  | 25 (16.7)           | 109 (19.4)          | 39 (13.4)                  |
| Model 1 <sup>§</sup> (age and sex adjusted)          | 1.0 (ref)   | 0.84 (0.57 to 1.23) | 0.88 (0.70 to 1.09) | <b>0.65 (0.46 to 0.90)</b> |
| Model 2 <sup>‡</sup> (fully adjusted)                | 1.0 (ref)   | 0.87 (0.58 to 1.26) | 0.90 (0.72 to 1.10) | <b>0.66 (0.47 to 0.90)</b> |
| Model 3 <sup>  </sup> (selected confounders by DAGs) | 1.0 (ref)   | 0.85 (0.58 to 1.24) | 0.88 (0.71 to 1.09) | <b>0.65 (0.46 to 0.90)</b> |
| COVID-19 related death, n (%)                        | 32 (2.5)    | 0 (0.0)             | 11 (2.0)            | 2 (0.69)                   |
| Model 1 <sup>§</sup> (age and sex adjusted)          | 1.0 (ref)   | NA                  | 0.71 (0.36 to 1.42) | 0.26 (0.07 to 1.19)        |
| Model 2 <sup>‡</sup> (fully adjusted)                | 1.0 (ref)   | NA                  | 0.71 (0.35 to 1.42) | 0.28 (0.06 to 1.20)        |
| Model 3 <sup>  </sup> (selected confounders by DAGs) | 1.0 (ref)   | NA                  | 0.71 (0.35 to 1.42) | 0.26 (0.07 to 1.20)        |
| Length of stay in hospital, mean (SD)                | 27.4 (15.3) | 26.3 (14.4)         | 26.7 (15.4)         | 25.0 (13.6)                |

|                                          |           |                      |                       |                               |
|------------------------------------------|-----------|----------------------|-----------------------|-------------------------------|
| Fully adjusted mean difference ‡(95% CI) | 1.0 (ref) | -0.68 (3.28 to 1.89) | -0.57 (-2.06 to 0.92) | <b>-2.08 (-4.04 to -0.14)</b> |
|------------------------------------------|-----------|----------------------|-----------------------|-------------------------------|

---

Abbreviations: CI, confidence interval; COVID-19, coronavirus disease; DAGs, directed acyclic graphs; SARS-CoV-2, severe acute respiratory syndrome coronavirus 2; SD, standard deviation.

\* Severe COVID-19 consisted of requirement of oxygen therapy, admission to the intensive care unit, invasive ventilation, or death.

§ Model 1: adjusted for age (20–39, 40–59, and ≥60 years) and sex.

‡ Model 2: adjusted for the age; sex; region of residence (Seoul Capital Area, Daegu/Gyeongbuk area, and other areas); Charlson comorbidity index (0, 1, and ≥2); history of diabetes mellitus, tuberculosis, stroke, and cardiovascular disease; body mass index (continuous; using the restricted cubic spline function); systolic blood pressure (continuous); diastolic blood pressure (continuous); fasting blood glucose (continuous); serum total cholesterol (continuous); glomerular filtration rate (≥90, 60–89, and ≤59 ml/min); household income (low, middle, and high); smoking (never, ex-, and current); alcoholic drinks (<1, 1–2, 3–4, ≥5 days per week); medication for hypertension, diabetes mellitus, and cardiovascular disease.

|| Model 3: adjusted for potential confounders selected by DAGs (age; sex; region of residence; household income; smoking; and alcoholic drinks).

Numbers in bold indicate significant differences ( $P < 0.05$ ).

**Table S4.** Baseline characteristics of patients who performed the SARS-CoV-2 testing stratified by MET score in the Korean nationwide cohort (cohort C)

| Characteristic    | Entire cohort  | Physical activity level, MET min/week |                       |                     |               |
|-------------------|----------------|---------------------------------------|-----------------------|---------------------|---------------|
|                   |                | Inactive                              | Insufficiently active | Active              | Highly Active |
|                   |                | (MET, 0)                              | (MET, 1 to <500)      | (MET, 500 to <1000) | (MET, ≥ 1000) |
| Total, n (%)      | 76,395 (100.0) | 33,263 (43.5)                         | 12,650 (16.6)         | 9689 (12.7)         | 20,793 (27.2) |
| Age, years, n (%) |                |                                       |                       |                     |               |
| 20-39             | 25,614 (33.5)  | 9271 (27.9)                           | 5310 (42.0)           | 3611 (37.3)         | 7422 (35.7)   |
| 40-59             | 28,856 (37.8)  | 12,410 (37.3)                         | 5143 (41.7)           | 3738 (38.6)         | 7565 (36.4)   |
| ≥ 60              | 21,925 (28.7)  | 11,582 (34.8)                         | 2197 (17.4)           | 2340 (24.2)         | 5806 (27.9)   |
| Sex, n (%)        |                |                                       |                       |                     |               |
| Male              | 37,272 (48.8)  | 14,770 (44.4)                         | 5887 (46.5)           | 4698 (48.5)         | 11,917 (57.3) |

|                                     |               |               |             |             |               |
|-------------------------------------|---------------|---------------|-------------|-------------|---------------|
| Female                              | 39,123 (51.2) | 18,493 (55.6) | 6763 (53.5) | 4991 (51.5) | 8876 (42.7)   |
| Region of residence, n (%)          |               |               |             |             |               |
| Seoul Capital Area                  | 34,149 (44.7) | 14,747 (44.3) | 5933 (46.9) | 4342 (44.8) | 9127 (43.9)   |
| Daegu/Gyeongbuk area                | 14,910 (19.5) | 6912 (20.8)   | 2258 (17.9) | 1866 (19.3) | 3874 (18.6)   |
| Other area                          | 27,336 (35.8) | 11,604 (34.9) | 4459 (35.3) | 3481 (35.9) | 7792 (37.5)   |
| Charlson comorbidity index, n (%)   |               |               |             |             |               |
| 0                                   | 44,854 (58.7) | 17,389 (52.3) | 8522 (67.4) | 5962 (61.5) | 12,398 (59.6) |
| 1                                   | 9361 (12.3)   | 5963 (17.9)   | 2075 (16.4) | 1645 (17.0) | 3520 (16.9)   |
| ≥2                                  | 22,180 (29.0) | 9911 (29.8)   | 2053 (16.2) | 2082 (21.5) | 4875 (23.5)   |
| History of diabetes mellitus, n (%) | 6518 (8.5)    | 3386 (10.2)   | 676 (5.3)   | 712 (7.4)   | 1744 (8.4)    |
| History of tuberculosis, n (%)      | 1585 (2.1)    | 686 (2.1)     | 285 (2.3)   | 183 (1.9)   | 431 (2.1)     |

|                                            |               |               |              |              |               |
|--------------------------------------------|---------------|---------------|--------------|--------------|---------------|
| History of stroke, n (%)                   | 1038 (1.4)    | 586 (1.8)     | 94 (0.7)     | 106 (1.1)    | 252 (1.2)     |
| History of cardiovascular disease, n (%)   | 2357 (3.1)    | 1283 (3.9)    | 228 (1.8)    | 247 (2.6)    | 599 (2.9)     |
| History of hypertension, n (%)             | 14,528 (19.0) | 7348 (22.1)   | 1665 (13.2)  | 1681 (17.4)  | 3834 (18.4)   |
| History of dyslipidemia, n (%)             | 5355 (7.0)    | 2557 (7.7)    | 740 (5.9)    | 682 (7.0)    | 1376 (6.6)    |
| Body mass index, kg/m <sup>2</sup> , n (%) |               |               |              |              |               |
| Mean (SD)                                  | 23.9 (3.8)    | 23.9 (3.8)    | 23.8 (3.7)   | 22.9 (3.8)   | 22.9 (3.9)    |
| <25                                        | 49,286 (64.5) | 21,534 (64.7) | 8478 (67.0)  | 6239 (64.4)  | 13,035 (62.7) |
| 25–30                                      | 22,453 (29.4) | 9702 (29.2)   | 3439 (27.2)  | 2842 (29.3)  | 6470 (31.1)   |
| ≥30                                        | 4656 (6.1)    | 2027 (6.1)    | 733 (5.8)    | 608 (6.3)    | 1288 (6.2)    |
| Systolic blood pressure, mmHg, mean (SD)   | 121.2 (14.8)  | 121.2 (14.8)  | 121.1 (14.4) | 121.6 (13.6) | 120.8 (13.7)  |
| Diastolic blood pressure, mmHg, mean (SD)  | 74.9 (10.0)   | 74.9 (10.0)   | 74.9 (9.9)   | 75.0 (9.89)  | 74.8 (9.7)    |



|                                           |               |               |              |              |               |
|-------------------------------------------|---------------|---------------|--------------|--------------|---------------|
| Fasting blood glucose, mg/dL, mean (SD)   | 99.4 (24.7)   | 99.4 (24.7)   | 97.9 (21.3)  | 99.8 (24.3)  | 98.2 (22.0)   |
| Serum total cholesterol, mg/dL, mean (SD) | 191.4 (40.4)  | 191.4 (40.4)  | 191.9 (38.4) | 190.5 (39.6) | 191.4 (38.4)  |
| Glomerular filtration rate, ml/min, n (%) |               |               |              |              |               |
| ≥90                                       | 40,449 (52.9) | 17,366 (52.2) | 7233 (57.2)  | 5191 (53.6)  | 10,659 (51.3) |
| 60-89                                     | 31,051 (40.6) | 13,037 (39.2) | 4938 (39.0)  | 4021 (41.5)  | 9055 (43.6)   |
| ≤59                                       | 4580 (6.0)    | 2860 (8.6)    | 479 (3.8)    | 477 (4.9)    | 1079 (5.2)    |
| Household income, n (%)                   |               |               |              |              |               |
| Low (0–39 percentile)                     | 21,427 (28.4) | 11,874 (35.7) | 3230 (25.5)  | 2825 (29.2)  | 6584 (31.7)   |
| Middle (40–79 percentile)                 | 33,482 (43.8) | 12,715 (38.2) | 5397 (42.7)  | 3953 (40.8)  | 8331 (40.1)   |
| High (80–100 percentile)                  | 21,486 (28.1) | 8674 (26.1)   | 4023 (31.8)  | 2911 (30.0)  | 5878 (28.3)   |
| Smoking, n (%)                            |               |               |              |              |               |

|                                        |               |               |             |             |               |
|----------------------------------------|---------------|---------------|-------------|-------------|---------------|
| Never smoker                           | 50,227 (65.7) | 22,538 (67.8) | 8584 (67.9) | 6507 (67.2) | 12,598 (60.6) |
| Ex-smoker                              | 12,492 (16.4) | 4715 (14.2)   | 2072 (16.4) | 1597 (16.5) | 4108 (19.8)   |
| Current smoker                         | 13,676 (17.9) | 6010 (18.1)   | 1994 (15.8) | 1585 (16.4) | 4087 (19.7)   |
| Alcoholic drinks, days per week, n (%) |               |               |             |             |               |
| <1                                     | 47,769 (62.5) | 22,169 (66.7) | 7482 (59.2) | 5933 (61.2) | 12,287 (59.1) |
| 1–2                                    | 20,375 (26.7) | 7606 (22.9)   | 3865 (30.6) | 2793 (28.8) | 6111 (29.4)   |
| 3–4                                    | 6074 (8.0)    | 2448 (7.4)    | 1078 (8.5)  | 764 (7.9)   | 1784 (8.6)    |
| ≥5                                     | 2075 (2.7)    | 1040 (3.1)    | 225 (1.8)   | 199 (2.1)   | 611 (2.9)     |
| Use of medication, n (%)               |               |               |             |             |               |
| Medication for hypertension, n (%)     | 13,663 (17.9) | 6966 (20.9)   | 1524 (12.1) | 1573 (16.2) | 3600 (17.3)   |
| Medication for dyslipidemia, n (%)     | 4450 (5.8)    | 2189 (6.6)    | 547 (4.3)   | 562 (5.8)   | 1152 (5.5)    |

---

|                                              |            |            |           |           |            |
|----------------------------------------------|------------|------------|-----------|-----------|------------|
| Medication for diabetes mellitus, n (%)      | 6080 (8.0) | 3174 (9.5) | 614 (4.9) | 668 (6.9) | 1624 (7.8) |
| Medication for cardiovascular disease, n (%) | 2153 (2.8) | 1178 (3.5) | 196 (1.6) | 233 (2.4) | 546 (2.6)  |

---

Abbreviations: MET, metabolic equivalent of task; SARS-CoV-2, severe acute respiratory syndrome coronavirus 2; SD, standard deviation.

**Table S5.** Adjusted relative risks (95% confidence intervals) of SARS-CoV-2 infection associated with study patients stratified by MET score (cohort C)

| Event                                                | Physical activity level, MET min/week |                            |                            |                     |
|------------------------------------------------------|---------------------------------------|----------------------------|----------------------------|---------------------|
|                                                      | Inactive                              | Insufficiently active      | Active                     | Highly Active       |
|                                                      | (MET, 0)                              | (MET, 1 to <500)           | (MET, 500 to <1000)        | (MET, ≥ 1000)       |
| COVID-19, n (%)                                      | 1087/33,263 (3.3)                     | 344/12,650 (2.7)           | 249/9689 (2.6)             | 615/20,793 (3.0)    |
| Adjusted RR (95% CI)                                 |                                       |                            |                            |                     |
| Model 1* (age and sex adjusted)                      | 1.0 (ref)                             | <b>0.82 (0.71 to 0.94)</b> | <b>0.75 (0.63 to 0.88)</b> | 0.90 (0.81 to 1.01) |
| Model 2 <sup>§</sup> (fully adjusted)                | 1.0 (ref)                             | 0.91 (0.79 to 1.04)        | <b>0.78 (0.66 to 0.92)</b> | 0.94 (0.85 to 1.05) |
| Model 3 <sup>  </sup> (selected confounders by DAGs) | 1.0 (ref)                             | <b>0.86 (0.76 to 0.99)</b> | 0.77 (0.65 to 0.90)        | 0.95 (0.85 to 1.05) |
| Severe COVID-19 <sup>‡</sup> , n (%)                 | 239/33,263 (0.72)                     | 58/12,650 (0.46)           | 39/9689 (0.40)             | 110/20,793 (0.53)   |

|                                                      |                  |                            |                            |                            |
|------------------------------------------------------|------------------|----------------------------|----------------------------|----------------------------|
| Adjusted RR (95% CI)                                 |                  |                            |                            |                            |
| Model 1* (age and sex adjusted)                      | 1.0 (ref)        | <b>0.67 (0.45 to 0.96)</b> | <b>0.62 (0.42 to 0.89)</b> | <b>0.75 (0.57 to 0.97)</b> |
| Model 2 <sup>§</sup> (fully adjusted)                | 1.0 (ref)        | 0.78 (0.53 to 1.12)        | <b>0.62 (0.43 to 0.90)</b> | 0.79 (0.61 to 1.03)        |
| Model 3 <sup>  </sup> (selected confounders by DAGs) | 1.0 (ref)        | 0.75 (0.51 to 1.08)        | <b>0.63 (0.43 to 0.90)</b> | 0.80 (0.61 to 1.03)        |
| COVID-19 related death, n (%)                        | 27/33,263 (0.07) | 5/12,650 (0.05)            | 1/9689 (0.01)              | 12/20,793 (0.06)           |
| Adjusted RR (95% CI)                                 |                  |                            |                            |                            |
| Model 1* (age and sex adjusted)                      | 1.0 (ref)        | 0.61 (0.15 to 1.99)        | <b>0.12 (0.02 to 0.94)</b> | 0.75 (0.40 to 1.49)        |
| Model 2 <sup>§</sup> (fully adjusted)                | 1.0 (ref)        | 0.81 (0.22 to 2.42)        | <b>0.17 (0.07 to 0.98)</b> | 0.79 (0.42 to 1.59)        |
| Model 3 <sup>  </sup> (selected confounders by DAGs) | 1.0 (ref)        | 0.71 (0.18 to 2.15)        | <b>0.13 (0.02 to 0.95)</b> | 0.77 (0.41 to 1.54)        |

---

Abbreviations: CI, confidence interval; COVID-19, coronavirus disease; DAGs, directed acyclic graphs; MET, metabolic equivalent of task;

RR, relative risk; SARS-CoV-2, severe acute respiratory syndrome coronavirus 2.

\* Model 1: adjusted for age (20–39, 40–59, and  $\geq 60$  years) and sex.

§ Model 2: adjusted for the age; sex; region of residence (Seoul Capital Area, Daegu/Gyeongbuk area, and other areas); Charlson comorbidity index (0, 1, and  $\geq 2$ ); history of diabetes mellitus, tuberculosis, stroke, and cardiovascular disease; body mass index (continuous; using the restricted cubic spline function); systolic blood pressure (continuous); diastolic blood pressure (continuous); fasting blood glucose (continuous); serum total cholesterol (continuous); glomerular filtration rate ( $\geq 90$ , 60–89, and  $\leq 59$  ml/min); household income (low, middle, and high); smoking (never, ex-, and current); alcoholic drinks (<1, 1–2, 3–4,  $\geq 5$  days per week); medication for hypertension, diabetes mellitus, and cardiovascular disease.

|| Model 3: adjusted for potential confounders selected by DAGs (age; sex; region of residence; household income; smoking; and alcoholic drinks).

‡ Severe COVID-19 consisted of requirement of oxygen therapy, admission to the intensive care unit, invasive ventilation, or death.

Numbers in bold indicate significant differences ( $P < 0.05$ ).



**Table S6.** Propensity score-matched baseline covariates and adjusted relative risks (95% confidence intervals) of SARS-CoV-2 infection, severe COVID-19 outcomes, and COVID-19 related death associated with study patients who engaged in physical activities according to MET score (patients with insufficient aerobic and muscle strengthening versus those with aerobic and muscle strengthening; propensity score matched C)

| Characteristic    | Types of physical activity     |                              | SMD   |
|-------------------|--------------------------------|------------------------------|-------|
|                   | Insufficient physical activity | Sufficient physical activity |       |
|                   | (MET, 0 to 500)                | (MET, $\geq$ 500)            |       |
| Total, n (%)      | 29,993                         | 29,993                       |       |
| Age, years, n (%) |                                |                              | 0.021 |
| 20-39             | 9158 (30.5)                    | 8967 (29.9)                  |       |
| 40-59             | 13,763 (45.9)                  | 14,136 (47.1)                |       |
| $\geq$ 60         | 9082 (30.3)                    | 9045 (30.2)                  |       |
| Sex, n (%)        |                                |                              | 0.025 |



|                                     |               |               |       |
|-------------------------------------|---------------|---------------|-------|
| Male                                | 13,763 (45.9) | 14,136 (47.1) |       |
| Female                              | 16,230 (54.1) | 15,857 (52.9) |       |
| Region of residence, n (%)          |               |               | 0.032 |
| Seoul Capital Area                  | 13,382 (44.6) | 14,029 (46.8) |       |
| Daegu/Gyeongbuk area                | 6188 (20.6)   | 5744 (19.2)   |       |
| Other area                          | 10,423 (34.8) | 10,220 (34.1) |       |
| Charlson comorbidity index, n (%)   |               |               | 0.016 |
| 0                                   | 16,928 (56.4) | 17,279 (57.6) |       |
| 1                                   | 5328 (17.8)   | 5041 (16.8)   |       |
| ≥2                                  | 7737 (25.8)   | 7673 (25.6)   |       |
| History of diabetes mellitus, n (%) | 2548 (8.5)    | 2655 (8.9)    | 0.013 |

|                                            |               |               |       |
|--------------------------------------------|---------------|---------------|-------|
| History of tuberculosis, n (%)             | 599 (2.0)     | 633 (2.1)     | 0.008 |
| History of stroke, n (%)                   | 337 (1.1)     | 390 (1.3)     | 0.015 |
| History of cardiovascular disease, n (%)   | 851 (2.8)     | 920 (3.1)     | 0.003 |
| History of hypertension, n (%)             | 5801 (19.3)   | 5837 (19.5)   | 0.013 |
| History of dyslipidemia, n (%)             | 2107 (7.0)    | 2174 (7.3)    | 0.009 |
| Body mass index, kg/m <sup>2</sup> , n (%) |               |               | 0.016 |
| <25                                        | 19,692 (65.7) | 19,939 (66.5) |       |
| 25–30                                      | 8579 (28.6)   | 8373 (27.9)   |       |
| ≥30                                        | 1722 (5.7)    | 1681 (5.6)    |       |
| Systolic blood pressure, mmHg, mean (SD)   | 121.3 (15.2)  | 121.1 (14.5)  | 0.014 |
| Diastolic blood pressure, mmHg, mean (SD)  | 74.9 (10.2)   | 74.7 (9.8)    | 0.022 |

|                                           |               |               |        |
|-------------------------------------------|---------------|---------------|--------|
| Fasting blood glucose, mg/dL, mean (SD)   | 99.4 (25.3)   | 99.6 (24.3)   | 0.005  |
| Serum total cholesterol, mg/dL, mean (SD) | 191.8 (40.5)  | 190.7 (39.4)  | 0.027  |
| Glomerular filtration rate, ml/min, n (%) |               |               | 0.061  |
| $\geq 90$                                 | 16,119 (53.7) | 16,841 (56.2) |        |
| 60-89                                     | 11,784 (39.3) | 11,475 (38.3) |        |
| $\leq 59$                                 | 2090 (7.0)    | 1677 (5.6)    |        |
| Household income, n (%)                   |               |               | <0.001 |
| Low (0–39 percentile)                     | 10,113 (33.7) | 10,185 (34.0) |        |
| Middle (40–79 percentile)                 | 11,799 (39.3) | 11,635 (38.8) |        |
| High (80–100 percentile)                  | 8081 (26.9)   | 8173 (27.3)   |        |
| Smoking, n (%)                            |               |               | 0.052  |

|                                        |               |               |       |
|----------------------------------------|---------------|---------------|-------|
| Never smoker                           | 20,287 (67.6) | 19,272 (64.3) |       |
| Ex-smoker                              | 4322 (14.4)   | 5139 (17.1)   |       |
| Current smoker                         | 5384 (18.0)   | 5582 (18.6)   |       |
| Alcoholic drinks, days per week, n (%) |               |               | 0.042 |
| <1                                     | 19,601 (65.4) | 18,525 (61.8) |       |
| 1–2                                    | 7200 (24.0)   | 8212 (27.4)   |       |
| 3–4                                    | 2292 (7.6)    | 2535 (8.5)    |       |
| ≥5                                     | 900 (3.0)     | 721 (2.4)     |       |
| Use of medication, n (%)               |               |               |       |
| Medication for hypertension, n (%)     | 5493 (18.3)   | 5485 (18.3)   | 0.003 |
| Medication for dyslipidemia, n (%)     | 1776 (5.9)    | 1821 (6.1)    | 0.006 |

|                                                      |            |                            |       |
|------------------------------------------------------|------------|----------------------------|-------|
| Medication for diabetes mellitus, n (%)              | 2386 (8.0) | 2485 (8.3)                 | 0.012 |
| Medication for cardiovascular disease, n (%)         | 782 (2.6)  | 845 (2.8)                  | 0.013 |
| <hr/>                                                |            |                            |       |
| COVID-19, n (%)                                      | 991 (3.3)  | 852 (2.8)                  |       |
| Model 1* (age and sex adjusted)                      | 1.0 (ref)  | <b>0.87 (0.80 to 0.95)</b> |       |
| Model 2 <sup>§</sup> (fully adjusted)                | 1.0 (ref)  | <b>0.90 (0.83 to 0.99)</b> |       |
| Model 3 <sup>  </sup> (selected confounders by DAGs) | 1.0 (ref)  | <b>0.88 (0.80 to 0.96)</b> |       |
| Severe COVID-19 <sup>‡</sup> , n (%)                 | 209 (0.70) | 146 (0.49)                 |       |
| Model 1* (age and sex adjusted)                      | 1.0 (ref)  | <b>0.71 (0.57 to 0.87)</b> |       |
| Model 2 <sup>§</sup> (fully adjusted)                | 1.0 (ref)  | <b>0.77 (0.63 to 0.95)</b> |       |
| Model 3 <sup>  </sup> (selected confounders by DAGs) | 1.0 (ref)  | <b>0.72 (0.58 to 0.89)</b> |       |
| COVID-19 related death, n (%)                        | 23 (0.07)  | 11 (0.04)                  |       |

|                                                      |           |                            |
|------------------------------------------------------|-----------|----------------------------|
| Model 1* (age and sex adjusted)                      | 1.0 (ref) | <b>0.48 (0.24 to 0.98)</b> |
| Model 2 <sup>§</sup> (fully adjusted)                | 1.0 (ref) | 0.51 (0.26 to 1.01)        |
| Model 3 <sup>  </sup> (selected confounders by DAGs) | 1.0 (ref) | <b>0.49 (0.24 to 0.99)</b> |

---

Abbreviations: CI, confidence interval; COVID-19, coronavirus disease; DAGs, directed acyclic graphs; MET, metabolic equivalent of task; SARS-CoV-2, severe acute respiratory syndrome coronavirus 2; SD, standard deviation; SMD, standardized mean difference.

\* Model 1: adjusted for age (20–39, 40–59, and  $\geq 60$  years) and sex.

<sup>§</sup> Model 2: adjusted for the age; sex; region of residence (Seoul Capital Area, Daegu/Gyeongbuk area, and other areas); Charlson comorbidity index (0, 1, and  $\geq 2$ ); history of diabetes mellitus, tuberculosis, stroke, and cardiovascular disease; body mass index (continuous; using the restricted cubic spline function); systolic blood pressure (continuous); diastolic blood pressure (continuous); fasting blood glucose (continuous); serum total cholesterol (continuous); glomerular filtration rate ( $\geq 90$ , 60–89, and  $\leq 59$  ml/min); household income (low, middle, and high); smoking (never, ex-, and current); alcoholic drinks ( $< 1$ , 1–2, 3–4,  $\geq 5$  days per week); medication for hypertension, diabetes mellitus, and cardiovascular disease.

<sup>||</sup> Model 3: adjusted for potential confounders selected by DAGs (age; sex; region of residence; household income; smoking; and alcoholic drinks).

<sup>‡</sup> Severe COVID-19 consisted of requirement of oxygen therapy, admission to the intensive care unit, invasive ventilation, or death.

An SMD of less than 0.1 indicates no major imbalance. All SMD values were less than 0.07 in the propensity-score-matched cohort.

Numbers in bold indicate significant differences ( $P < 0.05$ ).

**Table S7.** Baseline characteristics of patients who performed the SARS-CoV-2 testing and received the general health examination (2015-2020) stratified by MET score in the Korean nationwide cohort (cohort D)

| Characteristic  | Entire cohort | Physical activity level, MET min/week |                       |                     |                    |
|-----------------|---------------|---------------------------------------|-----------------------|---------------------|--------------------|
|                 |               | Inactive                              | Insufficiently active | Active              | Highly Active      |
|                 |               | (MET, 0)                              | (MET, 1 to <500)      | (MET, 500 to <1000) | (MET, $\geq$ 1000) |
| Total, n (%)    | 118,768       | 22,811 (19.2)                         | 50,052 (42.1)         | 25,932 (21.8)       | 19,973 (16.8)      |
| Age, years (SD) |               |                                       |                       |                     |                    |
| 20-59           | 74,912 (63.1) | 11,248 (49.3)                         | 32,227 (64.3)         | 18,966 (73.2)       | 12,471 (62.4)      |
| 60-69           | 19,284 (16.2) | 4443 (19.5)                           | 7727 (15.4)           | 3621 (14.0)         | 3493 (17.5)        |
| 70-79           | 15,030 (12.7) | 3761 (16.5)                           | 6112 (12.2)           | 2342 (9.0)          | 2815 (14.1)        |
| $\geq$ 80       | 9542 (8.0)    | 3359 (14.7)                           | 3986 (8.0)            | 1003 (3.9)          | 1194 (6.0)         |
| Sex, n (%)      |               |                                       |                       |                     |                    |



|                                     |               |               |               |               |               |
|-------------------------------------|---------------|---------------|---------------|---------------|---------------|
| Male                                | 56,766 (47.8) | 10,128 (44.4) | 22,293 (44.5) | 13,132 (50.6) | 11,213 (56.1) |
| Female                              | 62,002 (52.2) | 12,683 (55.6) | 27,759 (55.5) | 12,800 (49.4) | 8760 (43.9)   |
| Region of residence, n (%)          |               |               |               |               |               |
| Rural                               | 42,804 (36.0) | 9306 (40.8)   | 17,680 (35.3) | 8743 (33.7)   | 7075 (35.4)   |
| Urban                               | 75,964 (64.0) | 13,505 (59.2) | 32,372 (64.7) | 17,189 (66.3) | 12,898 (64.6) |
| Charlson comorbidity index, n (%)   |               |               |               |               |               |
| 0                                   | 53,793 (45.3) | 7663 (33.6)   | 23,114 (46.2) | 13,942 (53.8) | 9074 (45.4)   |
| 1                                   | 17,198 (14.5) | 3305 (14.5)   | 7271 (14.5)   | 3782 (14.6)   | 2840 (14.2)   |
| ≥2                                  | 47,777 (40.2) | 11,843 (51.9) | 19,667 (39.3) | 8208 (31.7)   | 8059 (40.4)   |
| History of diabetes mellitus, n (%) | 11,649 (9.8)  | 2974 (13.0)   | 4808 (9.6)    | 1833 (7.1)    | 2034 (10.2)   |
| History of tuberculosis, n (%)      | 1860 (1.6)    | 294 (1.3)     | 812 (1.6)     | 444 (1.7)     | 310 (1.6)     |
| History of stroke, n (%)            | 1867 (1.6)    | 584 (2.6)     | 758 (1.5)     | 269 (1.0)     | 256 (1.3)     |

|                                               |               |               |               |               |               |
|-----------------------------------------------|---------------|---------------|---------------|---------------|---------------|
| History of cardiovascular disease, n (%)      | 4895 (4.1)    | 1332 (5.8)    | 1986 (4.0)    | 771 (3.0)     | 806 (4.0)     |
| Body mass index, kg/m <sup>2</sup> , n (%)    |               |               |               |               |               |
| <25                                           | 77,882 (65.6) | 14,651 (64.2) | 33,221 (66.4) | 17,168 (66.2) | 12,842 (64.3) |
| 25–30                                         | 34,289 (28.9) | 6763 (29.7)   | 14,129 (28.2) | 7326 (28.3)   | 6071 (30.4)   |
| ≥30                                           | 6597 (5.6)    | 1397 (6.1)    | 2702 (5.4)    | 1438 (5.6)    | 1060 (5.3)    |
| Systolic blood pressure, mmHg, mean (SD)      | 121.9 (15.1)  | 123.5 (16.0)  | 121.4 (15.2)  | 120.8 (14.4)  | 122.6 (14.6)  |
| Diastolic blood pressure, mmHg, mean (SD)     | 75.0 (10.0)   | 75.5 (10.1)   | 74.8 (10.0)   | 74.9 (10.0)   | 75.2 (9.8)    |
| Fasting blood glucose, mg/dL, mean (SD)       | 100.5 (27.8)  | 103.5 (31.8)  | 100.2 (27.9)  | 98.5 (23.9)   | 100.4 (26.8)  |
| Serum total cholesterol, mg/dL, mean (SD)     | 190.4 (39.6)  | 189.8 (40.7)  | 190.8 (40.0)  | 191.0 (37.5)  | 189.2 (39.8)  |
| Serum LDL, mg/dL, mean (SD)                   | 109.3 (36.5)  | 109.2 (38.1)  | 109.6 (36.0)  | 109.7 (35.0)  | 108.4 (37.6)  |
| Serum HDL, mg/dL, mean (SD)                   | 56.5 (15.5)   | 54.7 (15.06)  | 56.5 (15.4)   | 57.4 (16.1)   | 57.4 (15.4)   |
| Glomerular filtration rate, ml/min, mean (SD) |               |               |               |               |               |

|                           |               |               |               |               |               |
|---------------------------|---------------|---------------|---------------|---------------|---------------|
| ≥90                       | 59,909 (50.4) | 10,493 (46.0) | 25,581 (51.1) | 14,071 (54.3) | 9764 (48.9)   |
| 60-89                     | 51,070 (43.0) | 10,025 (44.0) | 21,255 (42.5) | 10,737 (41.4) | 9053 (45.3)   |
| ≤59                       | 7789 (6.6)    | 2293 (10.1)   | 3216 (6.4)    | 1124 (4.3)    | 1156 (5.8)    |
| Household income, n (%)   |               |               |               |               |               |
| Low (0–39 percentile)     | 28,526 (24.0) | 6766 (29.7)   | 12,036 (24.1) | 5260 (20.3)   | 4464 (22.4)   |
| Middle (40–79 percentile) | 44,525 (37.5) | 8220 (36.0)   | 18,764 (37.5) | 10,039 (38.7) | 7502 (37.6)   |
| High (80–100 percentile)  | 45,717 (38.5) | 7825 (34.3)   | 19,252 (38.5) | 10,633 (41.0) | 8007 (40.1)   |
| Smoking, n (%)            |               |               |               |               |               |
| Never smoker              | 77,778 (65.5) | 15,532 (68.1) | 33,385 (66.7) | 16,580 (63.9) | 12,281 (61.5) |
| Ex-smoker                 | 19,775 (16.7) | 3012 (13.2)   | 7882 (15.8)   | 4755 (18.3)   | 4126 (20.7)   |
| Current smoker            | 21,215 (17.9) | 4267 (18.7)   | 8785 (17.6)   | 4597 (17.7)   | 3566 (17.9)   |

## Alcoholic drinks, days per week, n (%)

|     |               |               |               |               |               |
|-----|---------------|---------------|---------------|---------------|---------------|
| <1  | 66,717 (56.2) | 15,662 (68.7) | 28,283 (56.5) | 12,364 (47.7) | 10,408 (52.1) |
| 1–2 | 37,863 (31.9) | 4513 (19.8)   | 16,068 (32.1) | 10,433 (40.2) | 6849 (34.3)   |
| 3–4 | 10,106 (8.5)  | 1593 (7.0)    | 4112 (8.2)    | 2458 (9.5)    | 1943 (9.7)    |
| ≥5  | 4082 (3.4)    | 1043 (4.6)    | 1589 (3.2)    | 677 (2.6)     | 773 (3.9)     |

## Use of medication, n (%)

|                                              |               |             |             |             |             |
|----------------------------------------------|---------------|-------------|-------------|-------------|-------------|
| Medication for hypertension, n (%)           | 24,119 (20.3) | 6098 (26.7) | 9838 (19.7) | 4091 (15.8) | 4092 (20.5) |
| Medication for diabetes mellitus, n (%)      | 10,945 (9.2)  | 2817 (12.4) | 4541 (9.1)  | 1689 (6.5)  | 1898 (9.5)  |
| Medication for cardiovascular disease, n (%) | 4467 (3.8)    | 1229 (5.4)  | 1823 (3.6)  | 680 (2.6)   | 735 (3.7)   |

---

Abbreviations: MET, metabolic equivalent of task; SARS-CoV-2, severe acute respiratory syndrome coronavirus 2; SD, standard deviation.

**Table S8.** Adjusted relative risks (95% confidence intervals) of SARS-CoV-2 infection associated with study participants who engaged in physical activities according to MET score (cohort D)

| Event                                                | Physical activity level, MET min/week |                            |                            |                            |
|------------------------------------------------------|---------------------------------------|----------------------------|----------------------------|----------------------------|
|                                                      | Inactive                              | Insufficiently active      | Active                     | Highly Active              |
|                                                      | (MET, 0)                              | (MET, 1 to <500)           | (MET, 500 to <1000)        | (MET, ≥ 1000)              |
| COVID-19, n (%)                                      | 803/22,811 (3.5)                      | 1641/50,052 (3.3)          | 816/25,932 (3.2)           | 622/19,973 (3.1)           |
| Adjusted RR (95% CI)                                 |                                       |                            |                            |                            |
| Model 1* (age and sex adjusted)                      | 1.0 (ref)                             | <b>0.92 (0.85 to 0.99)</b> | <b>0.89 (0.81 to 0.98)</b> | <b>0.91 (0.82 to 0.99)</b> |
| Model 2 <sup>§</sup> (fully adjusted)                | 1.0 (ref)                             | <b>0.89 (0.82 to 0.97)</b> | <b>0.85 (0.75 to 0.96)</b> | <b>0.85 (0.74 to 0.99)</b> |
| Model 3 <sup>  </sup> (selected confounders by DAGs) | 1.0 (ref)                             | <b>0.91 (0.84 to 0.99)</b> | <b>0.89 (0.80 to 0.98)</b> | <b>0.91 (0.81 to 0.99)</b> |
| Severe COVID-19 <sup>‡</sup> , n (%)                 | 75/22,811 (0.33)                      | 109/50,052 (0.22)          | 49/25,932 (0.19)           | 44/19,973 (0.22)           |

|                                                      |                  |                            |                            |                            |
|------------------------------------------------------|------------------|----------------------------|----------------------------|----------------------------|
| Adjusted RR (95% CI)                                 |                  |                            |                            |                            |
| Model 1* (age and sex adjusted)                      | 1.0 (ref)        | <b>0.66 (0.49 to 0.87)</b> | <b>0.58 (0.41 to 0.82)</b> | <b>0.70 (0.49 to 0.99)</b> |
| Model 2 <sup>§</sup> (fully adjusted)                | 1.0 (ref)        | <b>0.65 (0.47 to 0.86)</b> | <b>0.54 (0.35 to 0.79)</b> | <b>0.66 (0.45 to 0.96)</b> |
| Model 3 <sup>  </sup> (selected confounders by DAGs) | 1.0 (ref)        | <b>0.65 (0.48 to 0.87)</b> | <b>0.57 (0.40 to 0.82)</b> | <b>0.69 (0.48 to 0.98)</b> |
| COVID-19 related death, n (%)                        | 39/22,811 (0.17) | 53/50,052 (0.11)           | 17/25,932 (0.07)           | 13/19,973 (0.07)           |
| Adjusted RR (95% CI)                                 |                  |                            |                            |                            |
| Model 1* (age and sex adjusted)                      | 1.0 (ref)        | <b>0.61 (0.40 to 0.93)</b> | <b>0.37 (0.21 to 0.67)</b> | <b>0.39 (0.21 to 0.72)</b> |
| Model 2 <sup>§</sup> (fully adjusted)                | 1.0 (ref)        | <b>0.60 (0.40 to 0.93)</b> | <b>0.35 (0.20 to 0.64)</b> | <b>0.37 (0.19 to 0.71)</b> |
| Model 3 <sup>  </sup> (selected confounders by DAGs) | 1.0 (ref)        | <b>0.61 (0.40 to 0.93)</b> | <b>0.36 (0.20 to 0.67)</b> | <b>0.39 (0.20 to 0.72)</b> |

---

Abbreviations here: CI, confidence interval; COVID-19, coronavirus disease; DAGs, directed acyclic graphs; MET, metabolic equivalent of task; RR, relative risk; SARS-CoV-2, severe acute respiratory syndrome coronavirus 2.

\*Model 1: adjusted for age (20-59, 60-69, 70-79, and  $\geq$  80 years) and sex.

§ Model 2: adjusted for the age; sex; region of residence (rural and urban); Charlson comorbidity index (0, 1, and  $\geq 2$ ); history of diabetes mellitus, tuberculosis, stroke, and cardiovascular disease; body mass index (continuous; using the restricted cubic spline function); systolic blood pressure (continuous); diastolic blood pressure (continuous); fasting blood glucose (continuous); serum total cholesterol (continuous); glomerular filtration rate ( $\geq 90$ , 60–89, and  $\leq 59$  ml/min); household income (low, middle, and high); smoking (never, ex-, and current); alcoholic drinks ( $< 1$ , 1–2, 3–4,  $\geq 5$  days per week); medication for hypertension, diabetes mellitus, and cardiovascular disease.

|| Model 3: adjusted for potential confounders selected by DAGs (age; sex; region of residence; household income; smoking; and alcoholic drinks).

‡ Severe COVID-19 consisted of requirement of oxygen therapy, admission to the intensive care unit, invasive ventilation, or death.

Numbers in bold indicate significant differences ( $P < 0.05$ ).

**Table S9.** Propensity score-matched baseline covariates and adjusted relative risks (95% confidence intervals) of SARS-CoV-2 infection associated with study participants who engaged in physical activities according MET score (insufficient physical activity versus sufficient physical activity; propensity score matched cohort D)

| Characteristic  | Insufficient physical activity<br>(MET, 0 to 500) | Sufficient physical activity<br>(MET, $\geq$ 500) | SMD   |
|-----------------|---------------------------------------------------|---------------------------------------------------|-------|
| Total, n (%)    | 11,930                                            | 11,930                                            |       |
| Age, years (SD) |                                                   |                                                   | 0.002 |
| 20-59           | 8764 (73.5)                                       | 8733 (73.2)                                       |       |
| 60-69           | 1652 (13.9)                                       | 1601 (13.4)                                       |       |
| 70-79           | 966 (8.1)                                         | 1130 (9.5)                                        |       |
| $\geq$ 80       | 548 (5.6)                                         | 466 (3.9)                                         |       |
| Sex, n (%)      |                                                   |                                                   | 0.004 |



|                                     |             |             |       |
|-------------------------------------|-------------|-------------|-------|
| Male                                | 6090 (51.1) | 6115 (51.3) |       |
| Female                              | 5840 (49.0) | 5815 (48.7) |       |
| Region of residence, n (%)          |             |             | 0.003 |
| Rural                               | 4032 (33.8) | 4016 (33.7) |       |
| Urban                               | 7898 (66.2) | 7914 (66.3) |       |
| Charlson comorbidity index, n (%)   |             |             | 0.006 |
| 0                                   | 6214 (52.1) | 6447 (54.0) |       |
| 1                                   | 1789 (15.0) | 1735 (14.5) |       |
| ≥2                                  | 3927 (32.9) | 3748 (31.4) |       |
| History of diabetes mellitus, n (%) | 827 (6.9)   | 855 (7.2)   | 0.008 |
| History of tuberculosis, n (%)      | 193 (1.6)   | 199 (1.7)   | 0.004 |
| History of stroke, n (%)            | 103 (0.9)   | 117 (1.0)   | 0.010 |

|                                               |              |              |        |
|-----------------------------------------------|--------------|--------------|--------|
| History of cardiovascular disease, n (%)      | 348 (2.9)    | 344 (2.9)    | 0.002  |
| Body mass index, kg/m <sup>2</sup> , n (%)    |              |              | <0.001 |
| < 25                                          | 7800 (65.4)  | 7845 (65.8)  |        |
| 25–30                                         | 3455 (29.0)  | 3390 (28.4)  |        |
| ≥30                                           | 675 (5.7)    | 695 (5.8)    |        |
| Systolic blood pressure, mmHg, mean (SD)      | 120.8 (14.4) | 120.8 (14.4) | 0.005  |
| Diastolic blood pressure, mmHg, mean (SD)     | 74.8 (9.9)   | 74.8 (9.9)   | 0.014  |
| Fasting blood glucose, mg/dL, mean (SD)       | 98.7 (24.7)  | 98.7 (24.7)  | 0.001  |
| Serum total cholesterol, mg/dL, mean (SD)     | 190.5 (37.2) | 190.5 (37.2) | 0.010  |
| Serum LDL, mg/dL, mean (SD)                   | 109.4 (36.2) | 109.4 (36.2) | 0.008  |
| Serum HDL, mg/dL, mean (SD)                   | 57.1 (14.7)  | 57.1 (14.7)  | 0.012  |
| Glomerular filtration rate, ml/min, mean (SD) |              |              | 0.002  |

|                           |             |             |       |
|---------------------------|-------------|-------------|-------|
| ≥90                       | 6502 (54.5) | 6594 (55.3) |       |
| 60-89                     | 4914 (41.2) | 4836 (40.5) |       |
| ≤59                       | 514 (4.3)   | 500 (4.2)   |       |
| Household income, n (%)   |             |             | 0.007 |
| Low (0–39 percentile)     | 2517 (21.1) | 2411 (20.2) |       |
| Middle (40–79 percentile) | 4590 (38.5) | 4747 (39.8) |       |
| High (80–100 percentile)  | 4823 (40.4) | 4772 (40.0) |       |
| Smoking, n (%)            |             |             | 0.007 |
| Never smoker              | 7654 (64.2) | 7590 (63.6) |       |
| Ex-smoker                 | 2033 (17.0) | 2095 (17.6) |       |
| Current smoker            | 2243 (18.8) | 2245 (18.8) |       |

|                                              |             |                            |       |
|----------------------------------------------|-------------|----------------------------|-------|
| Alcoholic drinks, days per week, n (%)       |             |                            | 0.005 |
| <1                                           | 5828 (48.9) | 5600 (46.9)                |       |
| 1–2                                          | 4585 (38.4) | 4897 (41.1)                |       |
| 3–4                                          | 1122 (9.4)  | 1109 (9.3)                 |       |
| ≥5                                           | 395 (3.3)   | 324 (2.7)                  |       |
| Use of medication, n (%)                     |             |                            |       |
| Medication for hypertension, n (%)           | 1795 (15.1) | 1807 (15.2)                | 0.003 |
| Medication for diabetes mellitus, n (%)      | 776 (6.5)   | 788 (6.6)                  | 0.004 |
| Medication for cardiovascular disease, n (%) | 305 (2.6)   | 302 (2.5)                  | 0.001 |
| COVID-19, n (%)                              | 429 (3.6)   | 372 (3.1)                  |       |
| Model 1* (age and sex adjusted)              | 1.0 (ref)   | <b>0.86 (0.76 to 0.99)</b> |       |

|                                                      |           |                            |
|------------------------------------------------------|-----------|----------------------------|
| Model 2 <sup>§</sup> (fully adjusted)                | 1.0 (ref) | <b>0.87 (0.76 to 0.99)</b> |
| Model 3 <sup>  </sup> (selected confounders by DAGs) | 1.0 (ref) | <b>0.86 (0.76 to 0.99)</b> |
| Severe COVID-19, n (%)                               | 40 (0.28) | 24 (0.20)                  |
| Model 1* (age and sex adjusted)                      | 1.0 (ref) | <b>0.57 (0.34 to 0.97)</b> |
| Model 2 <sup>§</sup> (fully adjusted)                | 1.0 (ref) | <b>0.58 (0.35 to 0.99)</b> |
| Model 3 <sup>  </sup> (selected confounders by DAGs) | 1.0 (ref) | <b>0.58 (0.35 to 0.98)</b> |
| COVID-19 related death, n (%)                        | 21 (0.18) | 9 (0.08)                   |
| Model 1* (age and sex adjusted)                      | 1.0 (ref) | <b>0.44 (0.21 to 0.94)</b> |
| Model 2 <sup>§</sup> (fully adjusted)                | 1.0 (ref) | <b>0.46 (0.22 to 0.96)</b> |
| Model 3 <sup>  </sup> (selected confounders by DAGs) | 1.0 (ref) | <b>0.44 (0.21 to 0.94)</b> |

Abbreviations: CI, confidence interval; COVID-19, coronavirus disease; MET, metabolic equivalent of task; SARS-CoV-2, severe acute

respiratory syndrome coronavirus 2; SD, standard deviation.

\* Model 1: adjusted for age (20-59, 60-69, 70-79, and  $\geq 80$  years) and sex.

Abbreviations here: CI, confidence interval; COVID-19, coronavirus disease; DAGs, directed acyclic graphs; MET, metabolic equivalent of task; SARS-CoV-2, severe acute respiratory syndrome coronavirus 2; OR, odds ratio.

\* Model 1: adjusted for age (20-59, 60-69, 70-79, and  $\geq 80$  years) and sex.

§ Model 2: adjusted for the age; sex; region of residence (rural and urban); Charlson comorbidity index (0, 1, and  $\geq 2$ ); history of diabetes mellitus, tuberculosis, stroke, and cardiovascular disease; body mass index (continuous; using the restricted cubic spline function); systolic blood pressure (continuous); diastolic blood pressure (continuous); fasting blood glucose (continuous); serum total cholesterol (continuous); glomerular filtration rate ( $\geq 90$ , 60–89, and  $\leq 59$  ml/min); household income (low, middle, and high); smoking (never, ex-, and current); alcoholic drinks ( $<1$ , 1–2, 3–4,  $\geq 5$  days per week); medication for hypertension, diabetes mellitus, and cardiovascular disease.

|| Model 3: adjusted for potential confounders selected by DAGs (age; sex; region of residence; household income; smoking; and alcoholic drinks).

‡ Severe COVID-19 consisted of admission to the intensive care unit, invasive ventilation, or death.

An SMD of less than 0.1 indicates no major imbalance. All SMD values were less than 0.015 in the propensity-score-matched cohort .

Numbers in bold indicate significant differences ( $P < 0.05$ ).

**Table S10.** Baseline characteristics of COVID-19 patients who received the general health examination (2015-2020) in the Korean nationwide cohort (total n = 3882; Cohort E)

| Characteristic  | Physical activity level, MET min/week |                       |                     |               |
|-----------------|---------------------------------------|-----------------------|---------------------|---------------|
|                 | Inactive                              | Insufficiently active | Active              | Highly Active |
|                 | (MET, 0)                              | (MET, 1 to <500)      | (MET, 500 to <1000) | (MET, ≥ 1000) |
| Total, n (%)    | 803 (20.7)                            | 1641 (42.3)           | 816 (21.0)          | 622 (16.0)    |
| Age, years (SD) |                                       |                       |                     |               |
| 20-59           | 424 (52.8)                            | 988 (60.3)            | 570 (69.9)          | 381 (61.3)    |
| 60-69           | 231 (28.8)                            | 378 (23.0)            | 155 (19.0)          | 146 (23.5)    |
| 70-79           | 85 (10.6)                             | 182 (11.1)            | 72 (8.8)            | 76 (12.2)     |
| ≥ 80            | 63 (7.9)                              | 93 (5.7)              | 19 (2.3)            | 19 (3.1)      |
| Sex, n (%)      |                                       |                       |                     |               |



|                                     |            |             |            |            |
|-------------------------------------|------------|-------------|------------|------------|
| Male                                | 280 (34.9) | 514 (31.3)  | 350 (42.9) | 304 (48.9) |
| Female                              | 523 (65.1) | 1127 (68.7) | 466 (57.1) | 318 (51.1) |
| Region of residence, n (%)          |            |             |            |            |
| Rural                               | 61 (7.6)   | 148 (9.0)   | 92 (11.3)  | 77 (12.4)  |
| Urban                               | 742 (92.4) | 1493 (91.0) | 724 (88.7) | 545 (87.6) |
| Charlson comorbidity index, n (%)   |            |             |            |            |
| 0                                   | 326 (40.6) | 807 (49.2)  | 464 (56.9) | 312 (50.2) |
| 1                                   | 172 (21.4) | 284 (17.3)  | 112 (13.7) | 100 (16.1) |
| ≥2                                  | 305 (38.0) | 550 (33.5)  | 240 (29.4) | 210 (33.8) |
| History of diabetes mellitus, n (%) | 79 (9.8)   | 155 (9.5)   | 51 (6.3)   | 67 (10.8)  |
| History of tuberculosis, n (%)      | 9 (1.1)    | 23 (1.4)    | 12 (1.5)   | 7 (1.1)    |
| History of stroke, n (%)            | 14 (1.7)   | 16 (1.0)    | 6 (0.7)    | 6 (1.0)    |

|                                               |              |              |              |              |
|-----------------------------------------------|--------------|--------------|--------------|--------------|
| History of cardiovascular disease, n (%)      | 27 (3.4)     | 32 (2.0)     | 18 (2.2)     | 19 (3.1)     |
| Body mass index, kg/m <sup>2</sup> , n (%)    |              |              |              |              |
| <25                                           | 490 (61.0)   | 1077 (65.6)  | 545 (66.8)   | 393 (63.2)   |
| 25–30                                         | 271 (33.8)   | 486 (29.6)   | 235 (28.8)   | 208 (33.4)   |
| ≥30                                           | 42 (5.2)     | 78 (4.8)     | 36 (4.4)     | 21 (3.4)     |
| Systolic blood pressure, mmHg, mean (SD)      | 122.6 (15.6) | 120.9 (15.2) | 120.5 (15.5) | 122.3 (14.2) |
| Diastolic blood pressure, mmHg, mean (SD)     | 75.5 (10.2)  | 74.4 (9.8)   | 75.0 (10.4)  | 75.3 (9.5)   |
| Fasting blood glucose, mg/dL, mean (SD)       | 102.9 (27.8) | 100.5 (26.4) | 98.9 (20.4)  | 102.7 (39.3) |
| Serum total cholesterol, mg/dL, mean (SD)     | 194.8 (38.2) | 196.1 (37.7) | 194.0 (38.0) | 192.8 (36.4) |
| Serum LDL, mg/dL, mean (SD)                   | 114.6 (34.0) | 115.5 (33.8) | 113.4 (33.8) | 111.7 (32.9) |
| Serum HDL, mg/dL, mean (SD)                   | 54.8 (14.7)  | 56.6 (14.4)  | 58.5 (28.6)  | 57.8 (13.9)  |
| Glomerular filtration rate, ml/min, mean (SD) |              |              |              |              |

|                           |            |             |            |            |
|---------------------------|------------|-------------|------------|------------|
| ≥90                       | 387 (48.2) | 818 (49.9)  | 398 (48.8) | 296 (47.6) |
| 60-89                     | 363 (45.2) | 758 (46.2)  | 390 (47.8) | 307 (49.4) |
| ≤59                       | 53 (6.6)   | 65 (4.0)    | 28 (3.4)   | 19 (3.1)   |
| Household income, n (%)   |            |             |            |            |
| Low (0–39 percentile)     | 350 (43.6) | 590 (36.0)  | 251 (30.8) | 202 (32.5) |
| Middle (40–79 percentile) | 249 (31.0) | 548 (33.4)  | 291 (35.7) | 205 (33.0) |
| High (80–100 percentile)  | 204 (25.4) | 503 (30.7)  | 274 (33.6) | 215 (34.6) |
| Smoking, n (%)            |            |             |            |            |
| Never smoker              | 643 (80.1) | 1297 (79.0) | 610 (74.8) | 464 (74.6) |
| Ex-smoker                 | 95 (11.8)  | 226 (13.8)  | 145 (17.8) | 106 (17.0) |
| Current smoker            | 65 (8.1)   | 118 (7.2)   | 61 (7.5)   | 52 (8.4)   |

## Alcoholic drinks, days per week, n (%)

|     |            |             |            |            |
|-----|------------|-------------|------------|------------|
| <1  | 623 (77.6) | 1165 (71.0) | 488 (59.8) | 378 (60.8) |
| 1–2 | 114 (14.2) | 360 (21.9)  | 263 (32.2) | 181 (29.1) |
| 3–4 | 43 (5.4)   | 87 (5.3)    | 52 (6.4)   | 43 (6.9)   |
| ≥5  | 23 (2.9)   | 29 (1.8)    | 13 (1.6)   | 20 (3.2)   |

## Use of medication, n (%)

|                                              |            |           |            |            |
|----------------------------------------------|------------|-----------|------------|------------|
| Medication for hypertension, n (%)           | 158 (19.7) | 301(18.3) | 123 (15.1) | 110 (17.7) |
| Medication for diabetes mellitus, n (%)      | 75 (9.3)   | 148 (9.0) | 47 (5.8)   | 57 (9.2)   |
| Medication for cardiovascular disease, n (%) | 24 (3.0)   | 28 (1.7)  | 14 (1.7)   | 16 (2.6)   |

---

|                         |          |           |          |          |
|-------------------------|----------|-----------|----------|----------|
| Severe COVID-19*, n (%) | 75 (9.3) | 109 (6.6) | 49 (6.0) | 44 (7.1) |
|-------------------------|----------|-----------|----------|----------|

|                                               |           |                            |                            |                     |
|-----------------------------------------------|-----------|----------------------------|----------------------------|---------------------|
| Age and sex adjusted RR <sup>§</sup> (95% CI) | 1.0 (ref) | <b>0.73 (0.54 to 0.98)</b> | <b>0.67 (0.48 to 0.93)</b> | 0.75 (0.50 to 1.10) |
|-----------------------------------------------|-----------|----------------------------|----------------------------|---------------------|

|                                                      |             |                            |                               |                            |
|------------------------------------------------------|-------------|----------------------------|-------------------------------|----------------------------|
| Fully adjusted RR <sup>‡</sup> (95% CI)              | 1.0 (ref)   | <b>0.73 (0.53 to 0.99)</b> | <b>0.68 (0.44 to 0.98)</b>    | 0.74 (0.48 to 1.12)        |
| DAG                                                  | 1.0 (ref)   | <b>0.73 (0.54 to 0.98)</b> | <b>0.67 (0.47 to 0.94)</b>    | 0.75 (0.49 to 1.10)        |
| COVID-19 related death, n (%)                        | 39 (4.9)    | 53 (3.2)                   | 17 (2.1)                      | 13 (2.1)                   |
| Age and sex adjusted OR <sup>§</sup> (95% CI)        | 1.0 (ref)   | 0.72 (0.51 to 1.04)        | <b>0.48 (0.29 to 0.80)</b>    | <b>0.44 (0.24 to 0.81)</b> |
| Fully adjusted OR <sup>‡</sup> (95% CI)              | 1.0 (ref)   | 0.74 (0.49 to 1.06)        | <b>0.49 (0.27 to 0.82)</b>    | <b>0.43 (0.22 to 0.83)</b> |
| DAG                                                  | 1.0 (ref)   | 0.72 (0.50 to 1.04)        | <b>0.48 (0.28 to 0.81)</b>    | <b>0.44 (0.23 to 0.82)</b> |
| Length of stay in hospital, mean (SD)                | 27.5 (16.5) | 27.3 (15.1)                | 24.8 (14.3)                   | 26.1 (14.3)                |
| Fully adjusted mean difference <sup>‡</sup> (95% CI) | 1.0 (ref)   | -0.18 (-1.47 to 1.11)      | <b>-1.85 (-3.63 to -0.05)</b> | -0.68 (-3.19 to 1.82)      |

Abbreviations: CI, confidence interval; COVID-19, coronavirus disease; MET, metabolic equivalent of task; SARS-CoV-2, severe acute respiratory syndrome coronavirus 2; OR, odds ratio.

\* Severe COVID-19 consisted of requirement of oxygen therapy, admission to the intensive care unit, invasive ventilation, or death.

§ Model 1: adjusted for age (20-59, 60-69, 70-79, and ≥ 80 years) and sex.

‡Model 2: adjusted for the age; sex; region of residence (rural and urban); Charlson comorbidity index (0, 1, and  $\geq 2$ ); history of diabetes mellitus, tuberculosis, stroke, and cardiovascular disease; body mass index (continuous; using the restricted cubic spline function); systolic blood pressure (continuous); diastolic blood pressure (continuous); fasting blood glucose (continuous); serum total cholesterol (continuous); glomerular filtration rate ( $\geq 90$ , 60–89, and  $\leq 59$  ml/min); household income (low, middle, and high); smoking (never, ex-, and current); alcoholic drinks ( $< 1$ , 1–2, 3–4,  $\geq 5$  days per week); medication for hypertension, diabetes mellitus, and cardiovascular disease.

Numbers in bold indicate significant differences ( $P < 0.05$ ).

**Table S11.** Age-stratified outcome characteristics in cohort A (total n = 76,395)

| Age, years, n (%) | COVID-19     | Severe COVID-19* | COVID-19 related death, |
|-------------------|--------------|------------------|-------------------------|
| Total             | 2295 (100.0) | 446 (100.0)      | 45 (100.0)              |
| 20-39             | 413 (18.0)   | 30 (6.7)         | 0 (0.0)                 |
| 40-59             | 1095 (47.7)  | 147 (33.0)       | 2 (4.4)                 |
| ≥ 60              | 787 (34.3)   | 269 (60.3)       | 43 (95.6)               |

Abbreviations: COVID-19, coronavirus disease; SARS-CoV-2, severe acute respiratory syndrome coronavirus 2.

\* Severe COVID-19 consisted of requirement of oxygen therapy, admission to the intensive care unit, invasive ventilation, or death.

**Table S12.** Bonferroni-Sidak's correction for multiple comparisons in Table 2

| Event                                            | Types of physical activity                    |                           |                     |                                  |
|--------------------------------------------------|-----------------------------------------------|---------------------------|---------------------|----------------------------------|
|                                                  | Insufficient aerobic and muscle strengthening | Muscle strengthening only | Aerobic only        | Aerobic and muscle strengthening |
| COVID-19, n (%)                                  | 1293/41,293 (3.1)                             | 150/5036 (3.0)            | 561/18,994 (3.0)    | 291/11,072 (2.6)                 |
| Adjusted RR (95% CI)                             |                                               |                           |                     |                                  |
| Model 2* (fully adjusted)                        | 1.0 (ref)                                     | 1.01 (0.73 to 1.42)       | 0.92 (0.77 to 1.12) | <b>0.84 (0.73 to 0.96)</b>       |
| Significance of model 2                          | -                                             | No                        | No                  | <b>Yes</b>                       |
| Significance after Bonferroni-Sidak's correction | -                                             | No                        | No                  | <b>Yes</b>                       |
| Severe COVID-19 <sup>‡</sup> , n (%)             | 273/41,293 (0.66)                             | 25/5036 (0.50)            | 109/18,994 (0.57)   | 39/11,072 (0.35)                 |
| Model 2* (fully adjusted)                        | 1.0 (ref)                                     | 0.93 (0.61 to 1.42)       | 0.86 (0.69 to 1.08) | <b>0.42 (0.19 to 0.91)</b>       |



|                                                  |                  |               |                     |                            |
|--------------------------------------------------|------------------|---------------|---------------------|----------------------------|
| Significance of model 2                          |                  | No            | No                  | <b>Yes</b>                 |
| Significance after Bonferroni-Sidak's correction | -                | No            | No                  | No                         |
| COVID-19 related death, n (%)                    | 32/41,293 (0.08) | 0/5036 (0.00) | 11/18,994 (0.06)    | 2/11,072 (0.02)            |
| Model 2* (fully adjusted)                        | 1.0 (ref)        | NA            | 0.71 (0.34 to 1.41) | <b>0.26 (0.07 to 0.99)</b> |
| Significance of model 2                          | -                |               | No                  | <b>Yes</b>                 |
| Significance after Bonferroni-Sidak's correction | -                | -             | No                  | No                         |

---

Abbreviations: CI, confidence interval; COVID-19, coronavirus disease; RR, relative risk; SARS-CoV-2, severe acute respiratory syndrome coronavirus 2.

\*Model 2: adjusted for the age; sex; region of residence (Seoul Capital Area, Daegu/Gyeongbuk area, and other areas); Charlson comorbidity index (0, 1, and  $\geq 2$ ); history of diabetes mellitus, tuberculosis, stroke, and cardiovascular disease; body mass index (continuous; using the cubic spline function); systolic blood pressure (continuous; using the restricted cubic spline function); diastolic blood pressure (continuous); fasting blood glucose (continuous); serum total cholesterol (continuous); glomerular filtration rate ( $\geq 90$ , 60–89, and  $\leq 59$  ml/min); household income (low, middle, and high); smoking (never, ex-, and current); alcoholic drinks (<1, 1–2, 3–4,  $\geq 5$  days per week);

medication for hypertension, diabetes mellitus, and cardiovascular disease.

‡ Severe COVID-19 consisted of requirement of oxygen therapy, admission to the intensive care unit, invasive ventilation, or death.

Numbers in bold indicate significant differences ( $P < 0.05$ ).

Table S13. Bonferroni-Sidak's correction for multiple comparisons in Table S5

| Event                                            | Physical activity level, MET min/week |                       |                            |                     |
|--------------------------------------------------|---------------------------------------|-----------------------|----------------------------|---------------------|
|                                                  | Inactive                              | Insufficiently active | Active                     | Highly Active       |
|                                                  | (MET, 0)                              | (MET, 1 to <500)      | (MET, 500 to <1000)        | (MET, ≥ 1000)       |
| COVID-19, n (%)                                  | 1087/33,263 (3.3)                     | 344/12,650 (2.7)      | 249/9689 (2.6)             | 615/20,793 (3.0)    |
| Model 2* (fully adjusted)                        | 1.0 (ref)                             | 0.91 (0.79 to 1.04)   | <b>0.78 (0.66 to 0.92)</b> | 0.94 (0.85 to 1.05) |
| Significance of model 2                          | -                                     | No                    | <b>Yes</b>                 | No                  |
| Significance after Bonferroni-Sidak's correction | -                                     | No                    | <b>Yes</b>                 | No                  |
| Severe COVID-19‡, n (%)                          | 239/33,263 (0.72)                     | 58/12,650 (0.46)      | 39/9689 (0.40)             | 110/20,793 (0.53)   |
| Model 2* (fully adjusted)                        | 1.0 (ref)                             | 0.78 (0.53 to 1.12)   | <b>0.62 (0.43 to 0.90)</b> | 0.79 (0.61 to 1.03) |
| Significance of model 2                          |                                       | No                    | <b>Yes</b>                 | No                  |

| Significance after Bonferroni-Sidak's correction | -                | No                  | Yes                        | No                  |
|--------------------------------------------------|------------------|---------------------|----------------------------|---------------------|
| COVID-19 related death, n (%)                    | 27/33,263 (0.07) | 5/12,650 (0.05)     | 1/9689 (0.01)              | 12/20,793 (0.06)    |
| Model 2* (fully adjusted)                        | 1.0 (ref)        | 0.81 (0.22 to 2.42) | <b>0.17 (0.07 to 0.98)</b> | 0.79 (0.42 to 1.59) |
| Significance of model 2                          |                  | No                  | Yes                        | No                  |
| Significance after Bonferroni-Sidak's correction | -                | No                  | Yes                        | No                  |

---

Abbreviations: CI, confidence interval; COVID-19, coronavirus disease; MET, metabolic equivalent of task; RR, relative risk; SARS-CoV-2, severe acute respiratory syndrome coronavirus 2.

\*Model 2: adjusted for the age; sex; region of residence (Seoul Capital Area, Daegu/Gyeongbuk area, and other areas); Charlson comorbidity index (0, 1, and  $\geq 2$ ); history of diabetes mellitus, tuberculosis, stroke, and cardiovascular disease; body mass index (continuous; using the restricted cubic spline function); systolic blood pressure (continuous); diastolic blood pressure (continuous); fasting blood glucose (continuous); serum total cholesterol (continuous); glomerular filtration rate ( $\geq 90$ , 60–89, and  $\leq 59$  ml/min); household income (low, middle, and high); smoking (never, ex-, and current); alcoholic drinks ( $< 1$ , 1–2, 3–4,  $\geq 5$  days per week); medication for hypertension, diabetes mellitus, and cardiovascular disease.

‡ Severe COVID-19 consisted of requirement of oxygen therapy, admission to the intensive care unit, invasive ventilation, or death.

Numbers in bold indicate significant differences ( $P < 0.05$ ).

**Table S14.** Previous studies on the association between physical activity and the risk of COVID-19

| Title                                                                                                           | Study                 | Country | Setting                                                                                                                 | Exposure definition (exercise)                                                                                                                 | Results                                                                                                   |
|-----------------------------------------------------------------------------------------------------------------|-----------------------|---------|-------------------------------------------------------------------------------------------------------------------------|------------------------------------------------------------------------------------------------------------------------------------------------|-----------------------------------------------------------------------------------------------------------|
| Association of Timing and Balance of Physical Activity and Rest/Sleep With Risk of COVID-19: A UK Biobank Study | Rowlands et al (2021) | UK      | - UK Biobank<br>- A prospective cohort<br>- Adults age 40-69 years<br>- Total n=91,041<br>- COVID-19 patients=207       | 24-hour movement patterns from Axivity AX3 wrist-worn accelerometers (Axivity, Newcastle, UK)                                                  | No association between physical activity and the risk of SARS-CoV-2 positivity and COVID-19 severity.     |
| Inverse Relationship of Maximal Exercise Capacity to Hospitalization Secondary to Coronavirus Disease 2019      | Brawner et al (2021)  | USA     | - Medical chart review<br>- A retrospective cohort<br>- COVID-19 Patients ( $\geq 18$ years)<br>- COVID-19 patients=246 | Exercise tests: 1) the types of electrocardiography only; 2) electrocardiography plus echocardiography; and 3) cardiopulmonary exercise tests. | Beneficial association between maximal exercise capacity and the risk of hospitalization due to COVID-19. |
| Lifestyle risk factors, inflammatory mechanisms, and COVID-19 hospitalization: A                                | Hamer et al (2020)    | UK      | - UK Biobank<br>- A prospective cohort                                                                                  | International Physical Activity Questionnaire short form                                                                                       | Beneficial association between physical activity and the risk of hospitalization due to COVID-19.         |

---

|                              |  |  |                                      |  |  |
|------------------------------|--|--|--------------------------------------|--|--|
| community-based cohort study |  |  | - Adults age 40-69 years             |  |  |
| of 387,109 adults in UK      |  |  | - Total n=387,109                    |  |  |
|                              |  |  | - Hospitalized COVID-19 Patients=760 |  |  |

---

|                                                                                                                     |                     |     |                                                                                                                              |                                                                          |                                                                                                                                                          |
|---------------------------------------------------------------------------------------------------------------------|---------------------|-----|------------------------------------------------------------------------------------------------------------------------------|--------------------------------------------------------------------------|----------------------------------------------------------------------------------------------------------------------------------------------------------|
| Physical inactivity is associated with a higher risk for severe COVID-19 outcomes: a study in 48 440 adult patients | Sallis et al (2021) | USA | - Medical chart review<br>- A retrospective cohort<br>- COVID-19 Patients ( $\geq 18$ years)<br>- COVID-19 Patients =103,337 | Self-reported questionnaire based on the US Physical Activity Guidelines | Beneficial association between physical activity and the risk of COVID-19 severity (hospitalization, ICU admission, and death after COVID-19 diagnosis). |
|---------------------------------------------------------------------------------------------------------------------|---------------------|-----|------------------------------------------------------------------------------------------------------------------------------|--------------------------------------------------------------------------|----------------------------------------------------------------------------------------------------------------------------------------------------------|

---

Abbreviations: CI, confidence interval; COVID-19, coronavirus disease; ICU, intensive care unit; SARS-CoV-2, severe acute respiratory syndrome coronavirus 2.
