# Supplementary material
Source: HighWire-hosted journal article supplement (https://bjsm.bmj.com/content/56/16/901)
Supplement: inline-supplementary-material-6 [file inline-supplementary-material-6.pdf]

**Eligible criteria:**

- Over 20 years of age
- At least one SARS-CoV-2 test by medical or KDCA referral (excluding self-referral)
- At least one national general health examination (2015-2019)
- In South Korea

**Eligible**

**Korean nationwide cohort D and E**

**January 1, 2015**

**January 1, 2020**

**July 30, 2020**

**Cohort entry**

Enter cohort at date of SARS-CoV-2 test

- **Inactive** (0 MET min/week)
- **Insufficiently active** (1 to <500 MET min/week)
- **Active** (500 to <1000 MET min/week)
- **Highly Active** ( $\geq$  1000 MET min/week)

**Primary outcome**

- Test positive
- Severe COVID-19 illness
- COVID-19-related death

**Subgroup outcome**

- Length of hospital stay
