# Supplementary material
Source: HighWire-hosted journal article supplement (https://bjsm.bmj.com/content/56/16/901)
Supplement: inline-supplementary-material-8 [file inline-supplementary-material-8.pdf]

- Insufficient aerobic and muscle strengthening
- Aerobic and muscle strengthening

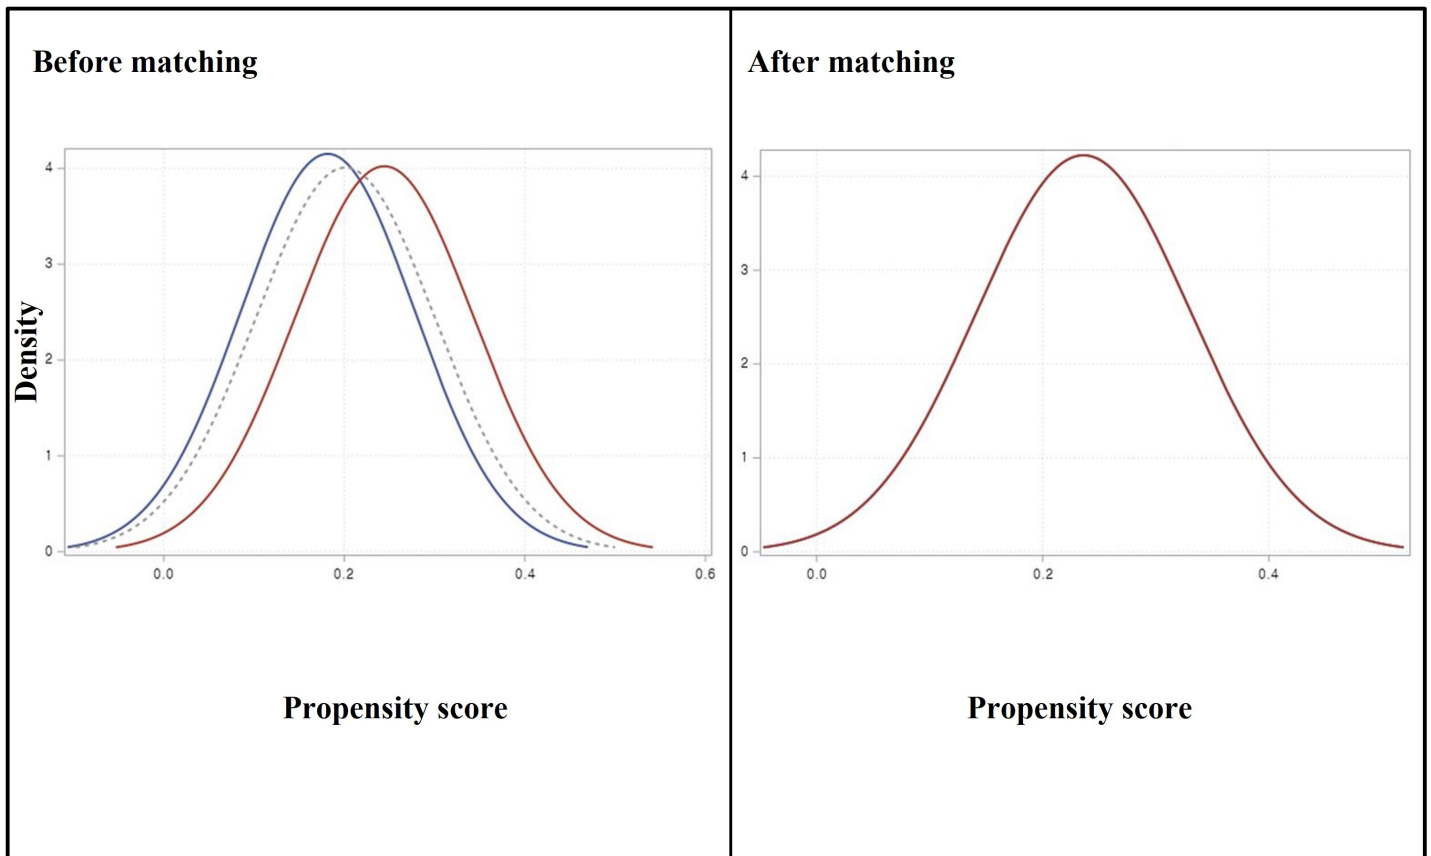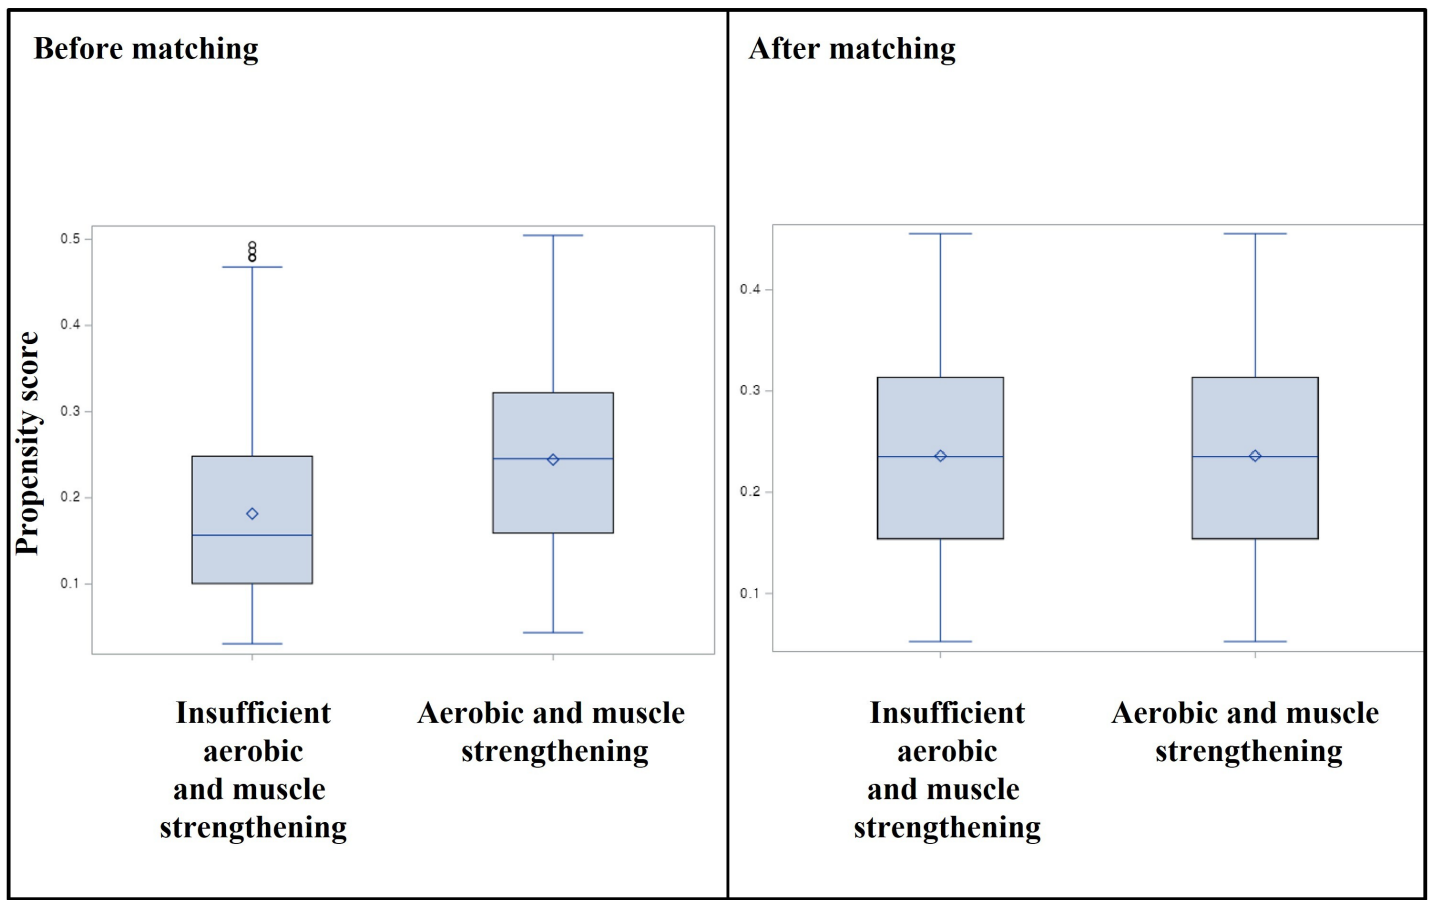

**Matched cohort A**
