# Supplementary material
Source: HighWire-hosted journal article supplement (https://bjsm.bmj.com/content/56/16/901)
Supplement: inline-supplementary-material-9 [file inline-supplementary-material-9.pdf]

- Sufficient physical activity ( $\geq 500$  MET min/week)
- Insufficient physical activity (0 to 500 MET min/week)

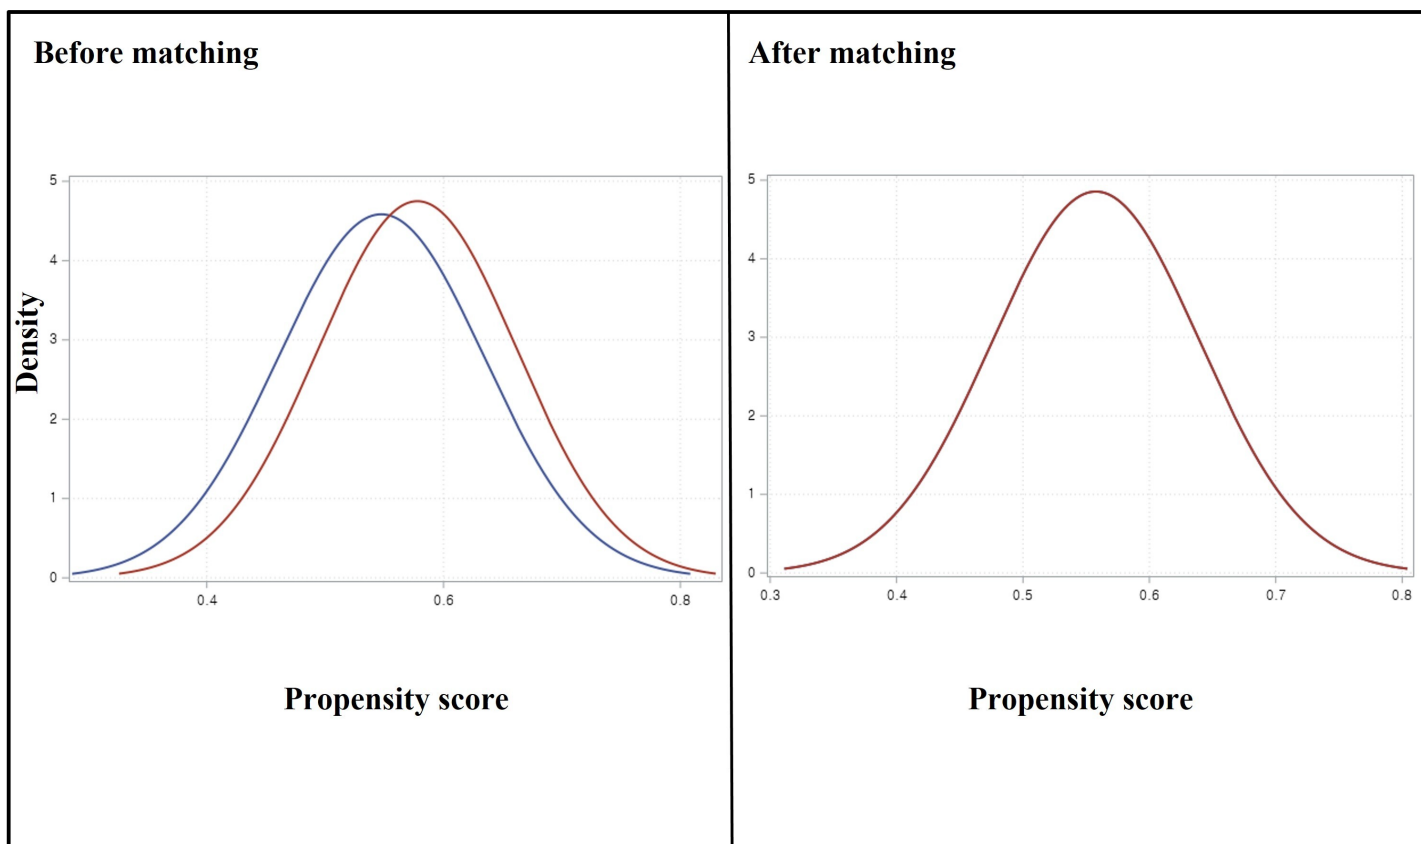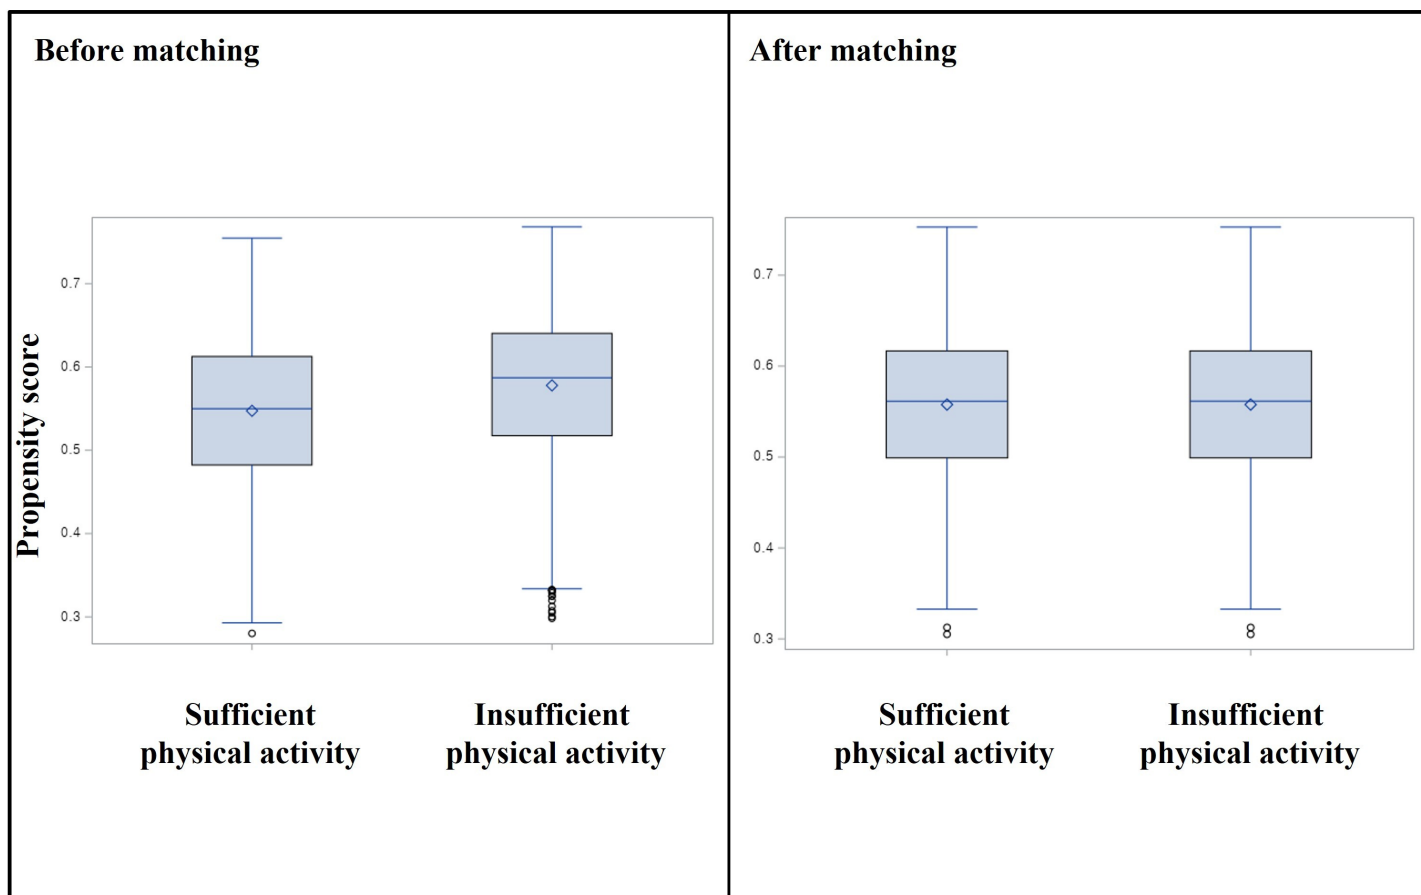

**Matched cohort C**
